1        **Availability of Zinc Impacts Interactions Between *Streptococcus***  
2                    ***sanguinis* and *Pseudomonas aeruginosa* in Co-culture**

3

4                    Kewei Li<sup>1,2</sup>, Alex Gifford<sup>3</sup>, Thomas Hampton<sup>1</sup> and George A. O'Toole<sup>1,\*</sup>

5

6        <sup>1</sup>Department of Microbiology and Immunology, Geisel School of Medicine at Dartmouth,  
7        Hanover, NH 03755

8        <sup>2</sup>School of Laboratory Medicine and Life Sciences, Wenzhou Medical University, Wenzhou,  
9        Zhejiang, China, 325035

10        <sup>3</sup>Department of Medicine, Dartmouth-Hitchcock Medical Center, Lebanon, NH 03756

11

12        \*To whom correspondence should be addressed:

13        Rm 202 Remsen Building

14        66 College Street

15        Geisel School of Medicine at Dartmouth

16        Hanover, NH 03755

17        Phone: (603) 650-1248 (office)

18        [georgeo@Dartmouth.edu](mailto:georgeo@Dartmouth.edu)

19

20        Key words: *Pseudomonas aeruginosa*, *Streptococcus*, cystic fibrosis, biofilm, polymicrobial,

21        zinc

22        Running title: *P. aeruginosa*-*Streptococcus* interactions

23 **ABSTRACT**

24 Airway infections associated with cystic fibrosis (CF) are polymicrobial. We reported  
25 previously that clinical isolates of *P. aeruginosa* promote the growth of a variety of  
26 streptococcal species. To explore the mechanistic basis of this interaction, we performed a  
27 genetic screen to identify mutants of *Streptococcus sanguinis* SK36 whose growth was no  
28 longer enhanced by *P. aeruginosa* PAO1. Mutations in zinc uptake systems of *S. sanguinis*  
29 SK36 reduced growth of these strains by 1-3 log compared to wild-type *S. sanguinis* SK36  
30 when grown in coculture with *P. aeruginosa* PAO1, while exogenous zinc (0.1-10  $\mu$ M) rescued  
31 the coculture defect of zinc uptake mutants of *S. sanguinis* SK36. Zinc uptake mutants of *S.*  
32 *sanguinis* SK36 had no obvious growth defect in monoculture. Consistent with a competition  
33 for zinc driving coculture dynamics, *S. sanguinis* SK36 grown in coculture with *P. aeruginosa*  
34 showed increased expression of zinc uptake genes compared to *S. sanguinis* grown alone.  
35 Strains of *P. aeruginosa* PAO1 defective in zinc transport also supported more robust growth  
36 by *S. sanguinis* compared to coculture with wild-type *P. aeruginosa* PAO1. An analysis of 118  
37 CF sputum samples revealed that total zinc levels varied from ~5-145  $\mu$ M. At relatively low  
38 zinc levels, *Pseudomonas* and *Streptococcus* were found in approximately equal abundance;  
39 at higher zinc levels, we observed an increasing relative abundance of *Pseudomonas* and  
40 decline of *Streptococcus*, perhaps as a result of increasing zinc toxicity. Together, our data  
41 indicate that the relative abundance of these microbes in the CF airway may be impacted by  
42 zinc levels.

43 **IMPORTANCE.** Polymicrobial infections in CF likely impact patient health, but the  
44 mechanism(s) underlying such interactions are poorly understood. Here we show that  
45 interactions between *Pseudomonas* and *Streptococcus* are modulated by zinc availability  
46 using an *in vitro* model system, and clinical data are consistent with this model. Together with  
47 previous studies, our work supports a role for metal homeostasis as a key factor driving  
48 microbial interactions.

## 49 INTRODUCTION

50 Cystic fibrosis (CF) is a monogenic autosomal recessive disorder caused by mutations in the  
51 cystic fibrosis transmembrane conductance regulator (CFTR) gene (1). It is estimated that  
52 ~70,000 individuals in the world are affected by CF and the most common mutation, caused  
53 by a deletion of phenylalanine at the 508th amino acid within the CFTR protein ( $\Delta F508$ ), is  
54 found in approximately 70% of this population (2, 3). CFTR dysfunction affects several body  
55 systems, and progressive lung disease due to chronic and recurrent microbial infections is  
56 the leading cause of morbidity and mortality in individuals with CF (4, 5). It has been shown  
57 that CF airway infections are polymicrobial (6, 7), and the composition and interspecies  
58 interactions within the polymicrobial communities can have profound and diverse  
59 consequences, including on bacterial growth (8-10), as well as disease progression and  
60 therapeutic outcomes (6, 11).

61 An example of such microbial interactions includes the CF-associated streptococcal species,  
62 the presence of which may influence the growth and/or virulence of other CF pathogens,  
63 including the important pathogen *Pseudomonas aeruginosa* (12, 13). In turn, *P. aeruginosa*  
64 can impact the growth and/or persistence of streptococci (8-10, 14), with the net impact of  
65 these interactions resulting in exacerbation (4, 15-17) or less severe loss of lung function (11,  
66 16, 18-21). Therefore, understanding how these pathogens interact with each other and their  
67 multicellular host to impact disease progression, as well as how these interactions are  
68 modified by the CF airway environment, is of high significance.

69 Zinc is an essential micronutrient for all organisms and serves as a structural or catalytic  
70 cofactor in 5–6% of proteins in bacterial proteome (22-24). However, high concentrations of  
71 zinc are toxic, possibly due to competition with other relevant metal ions (24, 25), inhibition of  
72 key enzymes and essential metabolic reactions in the cell (26-28) and inducing membrane  
73 stress (29). For most pathogens, there is intense competition for zinc in the face of the host's  
74 defense mechanisms, called nutritional immunity (30), and conversely elevating zinc level is

75 also a strategy used by macrophages to kill pathogens encapsulated in their phagosomes  
76 (31, 32).

77 To maintain zinc homeostasis, bacterial species have evolved multiple systems to import and  
78 export zinc in environments of zinc limitation or excess, respectively (33, 34). In *P.*  
79 *aeruginosa*, the two best-studied zinc acquisition systems are the high-affinity ZnuABC  
80 system (35-37) and the pseudopaline system (38, 39). ZnuABC is a member of the  
81 ATP-binding cassette (ABC) transporters, consisting of a zinc-specific binding periplasmic  
82 protein (ZnuA), an inner membrane permease (ZnuB), and an ATPase (ZnuC) (35, 37, 40).  
83 Loss of ZnuA in *P. aeruginosa* PAO1 results in an ~60% reduction in cellular zinc  
84 accumulation (35). The pseudopaline system is primarily involved in zinc uptake in zinc poor  
85 environments and zinc transport into the cell is achieved via the action of a four-gene operon  
86 (*cntOLMI*, also termed *zrmABCD*) (38, 39). This operon includes the genes for a  
87 TonB-dependent outer membrane pseudopaline receptor (CntO), two biosynthetic enzymes  
88 (CntL and CntM) responsible for synthesizing pseudopaline and an inner membrane  
89 transporter (CntI) involved in pseudopaline secretion (36, 38, 39). Both the ZnuABC system  
90 and the pseudopaline operon are negatively regulated by zinc level through the Fur-like zinc  
91 uptake regulator Zur (35, 37, 39), which can sense and respond to femtomolar changes of  
92 cytosolic zinc concentrations (41). When zinc is bound, Zur represses transcription of the zinc  
93 uptake systems and loss of Zur results in higher cytoplasmic zinc in *P. aeruginosa* (36, 37).

94 Similarly, several zinc transporters have been identified to contribute to zinc homeostasis and  
95 virulence in pathogenic streptococci (42, 43). In most streptococci, zinc acquisition involves a  
96 high-affinity zinc-ABC transporter, which is comprised of an integral membrane component  
97 (AdcB), an ATPase (AdcC) and one or several zinc-binding proteins (AdcA, AdcAll, Lbp, or  
98 Lmb) (42, 44-46). The streptococcal AdcR repressor, a MarR family regulator, is involved in  
99 regulation of this transporter (47).

100 Recent studies have suggested that total zinc levels are much higher in sputum from CF  
101 patients compared with healthy controls (48), but zinc availability is limited in the lung  
102 mucosa, leading to zinc starvation for *P. aeruginosa* during CF lung infection (49). Moreover,  
103 the host also employs zinc starvation or intoxication to retard streptococcal growth during  
104 colonization and infection (42, 43, 50). Nevertheless, the potential significance of zinc in the  
105 interplay between *P. aeruginosa* and *Streptococcus*, especially in the context of a  
106 polymicrobial infection in the CF airway, remains to be explored.

107 We recently showed that *P. aeruginosa* can enhance the growth of multiple oral  
108 *Streptococcus* spp. in coculture conditions (8, 10), but the molecular mechanism underlying  
109 such interactions is still poorly understood. In the present work, we used a comprehensive  
110 *Streptococcus sanguinis* SK36 mutant library to determine the genetic requirements for *S.*  
111 *sanguinis* SK36 to benefit from interaction with *P. aeruginosa*. Our results show that efficient  
112 zinc acquisition in *S. sanguinis* SK36 plays a critical role in *P. aeruginosa*-induced growth  
113 enhancement. We observed increased transcription of zinc uptake genes in *S. sanguinis*  
114 SK36 and demonstrate that *P. aeruginosa* and *S. sanguinis* SK36 are competing for zinc  
115 during co-cultivation. Furthermore, by coupling analysis of microbial communities and zinc  
116 content within CF sputum samples, we discovered a relationship between the relative  
117 abundance of *Streptococcus* and *Pseudomonas* with the concentrations of total zinc in CF  
118 sputum. These results suggest that zinc availability may play a role in  
119 *Pseudomonas-Streptococcus* interactions in vivo, and furthermore, changes in zinc levels  
120 may also be related to the development of the respiratory microflora in patients with CF.

121

## 122 **RESULTS**

123 ***P. aeruginosa* and its conditioned medium stimulate *S. sanguinis* growth on both**  
124 **plastic and CF-derived airway cells.** We have previously shown that *P. aeruginosa* can

125 enhance *S. sanguinis* SK36 growth either as planktonic or biofilm cells in coculture compared  
126 to that of *S. sanguinis* SK36 monoculture, while the *P. aeruginosa* population was not  
127 significantly impacted by the presence of *S. sanguinis* (8, 10), a finding confirmed here Fig.  
128 S1A. Furthermore, an assay monitoring biofilm formation over time shows that the higher  
129 viable count of *S. sanguinis* SK36 in coculture with *P. aeruginosa* is due to enhanced growth  
130 of *S. sanguinis* SK36 after a modest reduction in viability (Fig. 1A). Interestingly, *S. sanguinis*  
131 SK36 did show enhanced growth at later time points in monoculture, indicating that *P.*  
132 *aeruginosa* may stimulate transition out of lag phase as one possible mechanism of the  
133 observed increased viable count of *S. sanguinis* SK36 observed in the coculture assay  
134 system. The viable counts of *P. aeruginosa* were similar in monoculture and coculture at all  
135 timepoints (Fig. 1B).

136 In an attempt to understand the basis of this observed growth enhancement of *S. sanguinis*  
137 SK36, we tested whether a cell free supernatant of *P. aeruginosa* PAO1 could stimulate the  
138 growth of *S. sanguinis* SK36. We found that *P. aeruginosa* cell-free supernatant was indeed  
139 capable of promoting *S. sanguinis* biofilm growth on plastic (Fig. 1C). We noted a significant  
140 increase in the number of *S. sanguinis* cells grown in the presence of a 1/2 or 1/4 dilution of the  
141 original *P. aeruginosa* PAO1 supernatant (Fig. S1B), with a dose-dependent decrease in  
142 growth enhancement with increasing dilution of the supernatant. Undiluted *P. aeruginosa*  
143 PAO1 supernatant showed a less robust effect on *S. sanguinis* SK36 growth than the 1/2 or  
144 1/4 dilution, perhaps due to the known antimicrobial factors in *P. aeruginosa* supernatant,  
145 including siderophores, phenazines, cyanide and elastase (51-53). Taken together, these  
146 data suggest that one or more secreted factors in the *P. aeruginosa* PAO1 supernatant can  
147 enhance growth of *S. sanguinis* SK36.

148 To determine whether the interactions between *Streptococcus* and *P. aeruginosa* also occur  
149 when these microbes are grown in the presence of airway cells derived from patients with CF,  
150 we extended our observation to CF-derived bronchial epithelial cells homozygous for the

151  $\Delta$ F508 allele of CFTR (referred to as “CFBE monolayers” hereafter) (54). We evaluated *S.*  
152 *sanguinis* SK36 growth on CFBE monolayers in the absence or presence of *P. aeruginosa*  
153 cells or supernatants. As a control, *S. sanguinis* growth on tissue culture plates without host  
154 cells was also included (Fig. 1D, left-most column, plastic). Interestingly, *S. sanguinis* growth  
155 enhancement was observed with monocultures biofilms on host cells, and *P. aeruginosa* cells  
156 and supernatants further enhanced the growth of *S. sanguinis* SK36 (Fig. 1D). Collectively,  
157 our results demonstrate that the ability of *P. aeruginosa* PAO1 cells and supernatant to  
158 promote the growth of *S. sanguinis* SK36 under a variety of conditions.

159 **Identification of *S. sanguinis* mutants defective in growth enhancement mediated by *P.***  
160 ***aeruginosa*.** To identify *S. sanguinis* genes that are potentially required for the increase in *S.*  
161 *sanguinis* SK36 growth in the *P. aeruginosa* PAO1-*S. sanguinis* SK36 coculture, we  
162 performed a genome-wide screen of an available comprehensive *S. sanguinis* SK36 mutant  
163 library (55), which covers ~90% of the predicted 2270 protein coding genes in the *S.*  
164 *sanguinis* SK36 genome. In this screen we sought to identify mutants with reduced  
165 enhancement phenotypes in the presence of *P. aeruginosa* PAO1 (Fig. 2A). Of 2048 mutants  
166 screened, a total of 80 mutants showed a measurable and repeatable reduction in the  
167 enhancement of *S. sanguinis* growth (Table S1).

168 Among those 80 candidates, mutations were found in genes belonging to a wide variety of  
169 functional classes (Fig. 2B), including: (i) carbohydrate transport and metabolism (*SSA\_0222*,  
170 *SSA\_0773*, *SSA\_1261*, *SSA\_1521*, *SSA\_1749*, etc.), (ii) amino acid transport and  
171 metabolism (*SSA\_0564*, *SSA\_1043*, *SSA\_1044*, *SSA\_1341-1343*, etc.), (iii) cell division and  
172 cell envelope biogenesis (*SSA\_0015*, *SSA\_0655*, etc.), (iv) coenzyme metabolism  
173 (*SSA\_1201*, *SSA\_1202*, *SSA\_1536*, etc.), (v) DNA replication (*SSA\_1626*), (vi) nucleotide  
174 transport and metabolism (*SSA\_0568*, *SSA\_1163*, etc.), and (vii) translation, ribosomal  
175 structure and protein biosynthesis (*SSA\_0820*, *SSA\_1272*, *SSA\_1611*, *SSA\_1613*,  
176 *SSA\_1895*, *SSA\_1896*, *SSA\_2033*, *SSA\_2058*, etc.).

177 We also found genes involved in metal ion (zinc, iron and manganese) transport and  
178 metabolism (*SSA\_0136*, *SSA\_0137*, *SSA\_0260*, *SSA\_0261*, *SSA\_1955*, *SSA\_1956*,  
179 *SSA\_2365-2367*, etc.; Table S1 and Fig. 2B,C), which are involved in many crucial biological  
180 processes and are essential for bacterial survival in the environment or in the infected host  
181 (28). In particular, zinc has recently been shown to be essential for pathogenic streptococci in  
182 their growth, morphology and virulence during infection (42, 43).

183 **Zinc is required for the promotion of *S. sanguinis* growth by *P. aeruginosa*.** To further  
184 probe the basis for the enhanced *S. sanguinis* growth mediated by *P. aeruginosa*, we focused  
185 on the role of zinc importers identified in our screen (*SSA\_0136*, *SSA\_0137*, *SSA\_0260* and  
186 *SSA\_0261*; Fig. 2C). In *S. sanguinis* SK36, the *SSA\_0136* and *SSA\_0137* genes encode  
187 components of an Adc zinc ATP-binding cassette (ABC) transporter, which is involved in zinc  
188 uptake in several pathogenic streptococci. The *SSA\_0136* and *SSA\_0137* genes are called  
189 *adcC* and *adcB*, respectively (42, 45). The *SSA\_0260* gene, also termed SsaB (*S. sanguinis*  
190 adhesin B) (56), is an Lral family lipoprotein and serves as the substrate-binding protein for a  
191 Mn/Zn ABC import system (57). The *SSA\_0261* gene, also named *ssaC*, is located upstream  
192 of *SSA\_0260* and encodes a putative Mn/Zn ABC transporter permease (UniProt: A3CKL5).  
193 The *SSA\_0260* and *SSA\_0261* genes are predicted to be co-transcribed.

194 To validate our screen results, the four zinc transporter mutants were further tested in the  
195 coculture assay with *P. aeruginosa* PAO1. We found that the *SSA\_0136* and *SSA\_0137*  
196 mutants showed a ~2-log reduction in growth enhancement relative to that of the wild-type *S.*  
197 *sanguinis* SK36, while the *SSA\_0260* and *SSA\_0261* mutants displayed a 1-log reduction  
198 compared the wild-type *S. sanguinis* SK36 (Fig. 3A). In addition, the four mutants were also  
199 tested in monoculture to determine their growth behavior; the results revealed that these  
200 mutants grew like *S. sanguinis* WT (Fig. S2), suggesting that the growth enhancement  
201 deficiency observed for these mutants was not due to a general growth defect.



202 To confirm that the observed growth promotion defect was indeed caused by inactivation of  
203 the individual genes, we complemented each of the mutants with its corresponding gene  
204 under the control of an IPTG-inducible promoter, as reported (58). As shown in Fig. 3B, the  
205 complemented mutants showed growth enhancement phenotypes similar to that of wild-type  
206 *S. sanguinis* SK36, indicating that the mutation in these genes is solely responsible for the  
207 observed growth enhancement deficiency. Together, our data indicate that the functions of  
208 these genes are required for *S. sanguinis* SK36 to show enhanced growth in coculture with *P.*  
209 *aeruginosa*.

210 As zinc-ABC transporters are required for zinc acquisition (42), we reasoned that the defects  
211 in growth enhancement of these mutants during coculture might be due to the lack of zinc  
212 uptake. Consequently, the effect of supplementing additional zinc to the coculture medium  
213 was tested. We first measured the zinc levels of the medium used in our coculture conditions  
214 (MEM+L-Gln) and found the concentration of zinc is  $0.024 \pm 0.007 \mu\text{M}$ . Supplementation of the  
215 medium with 0.1  $\mu\text{M}$ , 1  $\mu\text{M}$  and 10  $\mu\text{M}$  zinc chloride restored the growth enhancement  
216 phenotype of each of the mutants to wild-type levels (Fig. 3A), and growth of the wild-type *S.*  
217 *sanguinis* SK36 was slightly promoted upon addition of 0.1  $\mu\text{M}$  and 1  $\mu\text{M}$  zinc (Fig. 3A). There  
218 was no significant difference in *P. aeruginosa* growth in monoculture or coculture in the  
219 zinc-amended and unamended media (Fig. S3). These results indicate that zinc is required for  
220 efficient growth enhancement of *S. sanguinis* during coculture with *P. aeruginosa*.

221 Notably, zinc added to 10  $\mu\text{M}$  slightly inhibited the growth of wild-type *S. sanguinis* SK36 and  
222 the SSA\_0136 and SSA\_0137 mutants, but not the SSA\_0260 and SSA\_0261 mutants (Fig.  
223 3A), suggesting that high concentrations of zinc are toxic to *S. sanguinis*, that these zinc  
224 transporters play an important role in zinc acquisition, and may have distinct affinities for zinc.

225 As mentioned above, *P. aeruginosa* can also promote *S. sanguinis* SK36 growth on airway  
226 cells (Fig. 1D). To further investigate the role of zinc in the *P. aeruginosa*-induced growth  
227 enhancement, we extended our observation to cocultures on CFBE monolayers. The

228 wild-type *S. sanguinis* SK36 strain and zinc transporter mutants were cocultured with *P.*  
229 *aeruginosa* with 1  $\mu$ M zinc chloride added to the medium. Similar to the observations in our  
230 coculture model on plastic, the zinc transporter mutants exhibited reduced growth  
231 enhancement, and supplementing the medium with 1  $\mu$ M zinc rescued the growth  
232 enhancement defect of these mutants (Fig. 3C). It is worth noting that there was no significant  
233 difference in growth of the wild-type *S. sanguinis* SK36 and the zinc transporter mutants on  
234 CFBE monolayers with or without addition of zinc (Fig. 3D). The growth of *S. sanguinis* was  
235 enhanced when cultured with CFBE cells even in the absence of zinc (Fig. 1D), indicating that  
236 CFBE monolayers produce factor(s) other than zinc that can enhance the growth of *S.*  
237 *sanguinis*. Taken together, these data demonstrate that enhanced *S. sanguinis* growth  
238 mediated by *P. aeruginosa* requires the zinc importers of *S. sanguinis* SK36.

239 **Coculture with *P. aeruginosa* upregulates zinc transporter gene expression in *S.***  
240 ***sanguinis*.** We next examined the expression patterns of zinc transporter genes in both *S.*  
241 *sanguinis* and *P. aeruginosa* using qRT-PCR. As shown above in Fig. 1A, in the first 2 hours  
242 of coculture with *P. aeruginosa* PAO1, *S. sanguinis* did not show a significant enhancement  
243 in growth. The mixed cultures showed a significant trend toward enhanced *S. sanguinis*  
244 growth and exhibited a robust increase in growth at 6 h. We saw no differences between the  
245 pure and the mixed cultures when we examined the growth kinetics of *P. aeruginosa* PAO1  
246 over the course of 24 h. As a consequence, qRT-PCR studies were performed on samples of  
247 2 h and 6 h for both monocultures and cocultures.

248 At 2 h, *S. sanguinis* zinc transporter genes *SSA\_0136* and *SSA\_0137* were upregulated 2.2-  
249 and 2.3-fold in coculture compared to *S. sanguinis* monoculture (Fig. 4A), respectively, while  
250 the expression of *SSA\_0260* and *SSA\_0261* genes were not significantly changed at this time  
251 point (Fig. 4A). At 6 h, *S. sanguinis* expression of all of the four zinc transporter genes was  
252 upregulated (4.4-fold for *SSA\_0136*; 4.7-fold for *SSA\_0137*; 8.2-fold for *SSA\_0260*; 4.3-fold  
253 for *SSA\_0261*) when co-cultured with *P. aeruginosa* (Fig. 4A). In contrast, the addition of

254 exogenous zinc (1  $\mu$ M) to the coculture medium reduced the expression of *S. sanguinis* zinc  
255 transporter genes to the same level as monocultures with zinc supplementation (Fig. 4B). The  
256 expression of *P. aeruginosa* PAO1 zinc uptake and regulator genes (*zur*, *znuA*, *cntI*, *cntO*)  
257 was minimally impacted by the presence of *S. sanguinis* compared to *P. aeruginosa* PAO1  
258 alone at either 2 h or 6 h (Fig. S4), although the zinc transporters of *P. aeruginosa* PAO1 were  
259 significantly upregulated in monoculture and coculture at 6 h compared to 2 h (Fig. S4).  
260 Notably, the robust increase in zinc transporter gene expression by *S. sanguinis* at 6 h  
261 corresponds to the induction of *P. aeruginosa* uptake systems at this same time point. Taken  
262 together, our studies are consistent with a model that *S. sanguinis* zinc transporter genes are  
263 induced by zinc deficiency when *S. sanguinis* is grown in coculture with *P. aeruginosa*,  
264 presumably due to zinc competition between these organisms.

265 **Mutations in zinc-related genes of *P. aeruginosa* promote growth of *S. sanguinis* in**  
266 **coculture.** Our data suggest that in coculture, *P. aeruginosa* and *Streptococcus* compete for  
267 zinc. As shown above, *S. sanguinis* SK36 mutants defective in zinc uptake show less robust  
268 viability when grown in coculture with *P. aeruginosa*. Thus, we would predict that mutations in  
269 zinc uptake in *P. aeruginosa* would result in *S. sanguinis* SK36 more effectively competing for  
270 zinc, likely reflected by an increase in viable counts of *S. sanguinis*.

271 We first assessed the impact of mutating zinc transport systems of *P. aeruginosa* PAO1 by  
272 testing strains with mutations in the *cntI*, *znuA* and *cntI-O* genes (Fig. 5A-C). In all cases,  
273 coculture with the *P. aeruginosa* zinc transport mutants resulted in a modest enhancement  
274 (~2-3-fold) of growth of *S. sanguinis* SK36 compared to coculture with the wild-type *P.*  
275 *aeruginosa* PAO1. One confounding factor in the interpretation of these results is that all of the  
276 *P. aeruginosa* zinc transport mutants show a small but consistent ~50% reduction in growth in  
277 coculture, which may be due to the lack of effective zinc transport or other anticipated defects,  
278 as reported (35, 37).

279 In *P. aeruginosa*, the expression of zinc importer genes is controlled by the Zur protein, a zinc  
280 responsive repressor (36), and loss of Zur results in a higher intracellular zinc concentration  
281 in *P. aeruginosa* (37). We generated a *P. aeruginosa* PAO1  $\Delta$ zur mutant and cocultured this  
282 mutant with *S. sanguinis* SK36 with or without zinc addition. Coculture of the wild-type *P.*  
283 *aeruginosa* PAO1 with *S. sanguinis* served as the control. In the absence of added zinc, there  
284 was no difference in the growth of *S. sanguinis* SK36 in the presence of the wild-type versus  
285 *P. aeruginosa* PAO1  $\Delta$ zur mutant (Fig. 5D-E). As described above, in mixed cultures of *S.*  
286 *sanguinis* and wild-type *P. aeruginosa* PAO1, we found excessive zinc concentration (10  $\mu$ M)  
287 led to a 9-fold decline in *S. sanguinis* growth compared to cells grown without zinc  
288 supplementation (Fig. 3A and Fig. 5D). In contrast, mixed cultures of *S. sanguinis* and *P.*  
289 *aeruginosa* PAO1  $\Delta$ zur mutant in the presence of 10  $\mu$ M zinc resulted in a 3.5-fold increase  
290 in *S. sanguinis* growth compared to that observed for coculture with WT *P. aeruginosa* PAO1  
291 (Fig. 5D). Given the protective action of the zinc hyper-accumulating *P. aeruginosa*  
292 PAO1  $\Delta$ zur mutant towards *S. sanguinis* SK36, these results further support the idea that *P.*  
293 *aeruginosa* and *S. sanguinis* compete for zinc when grown in coculture.

294 **The relationship between sputum zinc concentration and the relative abundance of**  
295 ***Streptococcus* and *Pseudomonas*.** In previous studies we had collected sputum samples  
296 from patients with CF and assessed the relative abundance of *Streptococcus* and  
297 *Pseudomonas* in these samples (59). These same samples were analyzed by ICP-MS, as  
298 reported (59, 60), to determine the concentration of zinc in the sputum. We observed that the  
299 concentration of zinc in these samples ranged from 4.8-145  $\mu$ M with a median of 36.4  $\mu$ M (n =  
300 118 sputum samples; Fig. S5).

301 We examined the relationship between zinc concentration and the relative abundance  
302 of *Streptococcus* and *Pseudomonas* in these samples and observed that *Streptococcus*  
303 dominated the sputum samples when the zinc concentration was low (Fig. 6, orange dots), but

304 that the relative abundance of *Pseudomonas* was higher in samples with high zinc levels (Fig.  
305 6, blue dots). Although measures like Pearson or Spearman correlation have been used to  
306 quantify this type of relationship and attach statistical significance, the compositional nature of  
307 bacterial community abundance suggests that these statistical approaches are inappropriate  
308 (61, 62). Therefore, we interpret *in vivo* associations observed between *Streptococcus*  
309 abundance, *Pseudomonas* abundance and zinc concentration as broadly consistent with  
310 the hypothesis that they are related without attaching a specific measure of statistical  
311 significance.

312

313 **Physiologically relevant levels of zinc impact the competition between *Streptococcus***  
314 **and *Pseudomonas*.** Given the observations described above, we decided to assess how  
315 varying zinc concentrations might impact the competition between various *Streptococcus*  
316 species found in the CF airway and *P. aeruginosa* (Fig. 7). For clinical isolates of *S.*  
317 *intermedius* (two isolates), *S. constellatus*, *S. parasanguinis* and *S. salivarius*, all of which  
318 have been found in the CF airway (11), increasing zinc across a range of concentrations  
319 measured in sputum resulted in progressively lower viability of many of these streptococci  
320 when grown in monoculture (Fig. 7A) or in coculture with *P. aeruginosa* (Fig. 7B). Thus, many  
321 of these strains appear to be sensitive to clinically-relevant concentrations of zinc.  
322 Interestingly, two isolates (*S. anginosus* and *S. oralis*) showed robust growth even at the  
323 highest level of zinc tested, indicating that these strains have increased tolerance to zinc for  
324 reasons we do not understand. Interestingly, the data in Figure 6 show that some patients  
325 with high levels of zinc in their sputum also have high relative abundance of *Streptococcus*;  
326 perhaps these patients harbor zinc-resistant streptococci.

327

## 328 DISCUSSION

329 In this study, we characterized the interaction between *P. aeruginosa* and *S. sanguinis* SK36  
330 in a dual species coculture model system. We demonstrated that zinc uptake by *S. sanguinis*  
331 SK36 was necessary for the *P. aeruginosa*-mediated promotion of *S. sanguinis* SK36 growth,  
332 and that *P. aeruginosa* competed with *S. sanguinis* SK36 for zinc during cocultivation.  
333 Additionally, we described a new association between zinc levels and the abundance of  
334 *Pseudomonas* and *Streptococcus* in CF sputum, thus highlighting the potential role of zinc in  
335 the interaction between these CF pathogens, as well as a potential role for this metal in  
336 shaping microbiome dynamics in the context of polymicrobial CF airway infections.

337 We report that co-cultivation with *P. aeruginosa* results in enhanced growth of *S. sanguinis*  
338 SK36 on either plastic or CF-derived airway cells, while *P. aeruginosa* growth is relatively  
339 unaffected during coculture. These data are consistent with previous reports from our group  
340 and others that coculture of streptococci with *P. aeruginosa* promotes the growth of  
341 streptococci, but with no obvious benefit to *P. aeruginosa* growth (8-10). Interestingly, in a  
342 study examining the interactions between *P. aeruginosa* and oral streptococci, including *S.*  
343 *sanguinis* (12, 63), *P. aeruginosa* growth was inhibited when streptococci were grown as a  
344 pioneer colonizer; streptococci can produce hydrogen peroxide (H<sub>2</sub>O<sub>2</sub>) to react with excess  
345 nitrite in the medium to generate reactive nitrogenous intermediates (RNI) for the inhibition of  
346 *P. aeruginosa* growth (12, 13, 63). We note that *P. aeruginosa* was inoculated in combination  
347 with *S. sanguinis* in our study under conditions that differ from these previous reports, and we  
348 did not observe streptococcus-mediated inhibition of *P. aeruginosa*. These observations  
349 suggest that the relationships between *P. aeruginosa* and streptococci are complex and likely  
350 are influenced by metabolic/environmental factors and colonization sequence. Understanding  
351 how various *in vitro* models reflect dynamic *in vivo* environments will contribute to efficiently  
352 synthesizing and better understanding the data obtained from various laboratories.

353 By screening a genome-wide non-essential gene mutant library of *S. sanguinis* SK36, we  
354 discovered 80 mutants with attenuation in *P. aeruginosa*-mediated growth enhancement  
355 (summarized in Table S1). The large number of genes (3.5% of the *S. sanguinis* SK36  
356 genome) found to be involved in this interspecies interaction and the variety of functions  
357 performed by these gene products provide new insights into the mechanism(s) of interaction  
358 between these two pathogens. Among the candidate genes we identified in our screen, we  
359 focused on a set of genes involved in the import of zinc. We demonstrate that the ability to  
360 obtain zinc as one factor contributing to the *P. aeruginosa*-induced enhancement of *S.*  
361 *sanguinis* SK36 growth, both in the presence and absence of human airway cells. Future  
362 studies will focus on the other genes identified in our screen.

363 Our observations here raise the question of whether zinc is a factor that drives growth  
364 enhancement of streptococci in the presence of *P. aeruginosa*, or whether efficient uptake of  
365 zinc is required to allow the growth-promoting factors produced by *P. aeruginosa* to exert their  
366 effect. We favor the latter model, in large part because we show that adding additional zinc to  
367 monocultures of *S. sanguinis* SK36 or other streptococci has, at best, a very modest effect on  
368 growth of the streptococci. That is, it does not appear that the streptococci are obtaining zinc  
369 from *P. aeruginosa* to enhance streptococcal growth. Instead, we observed that zinc  
370 starvation might be triggered by competition for this metal between *P. aeruginosa* and *S.*  
371 *sanguinis* SK36. Indeed, the elevated expression of the zinc transporters of wild-type *S.*  
372 *sanguinis* SK36 in mixed cultures, and the lack of such induction with zinc supplementation in  
373 the coculture medium, indicates that *S. sanguinis* SK36 becomes zinc-starved during its  
374 interaction with *P. aeruginosa*. In contrast, there was no significant change in the expression  
375 of *P. aeruginosa* zinc transporters under coculture conditions, indicating that *P. aeruginosa* is  
376 not lacking for this metal under these conditions; thus it is unlikely that *S. sanguinis* is “stealing”  
377 the zinc in the culture from *P. aeruginosa*. Taken together, we argue that zinc provided by *P.*  
378 *aeruginosa* is not a key factor enhancing streptococcal growth in coculture.

379 An intriguing observation here is the relationship between the sputum zinc levels and the  
380 relative fraction of *Pseudomonas* and *Streptococcus* in the CF sputum. In the human body,  
381 the zinc concentration varies among different tissues and total zinc concentration in induced  
382 sputum from control patients is around 1  $\mu\text{M}$  (50  $\mu\text{g/l}$ ) (42, 64), although higher levels of total  
383 sputum zinc have been reported in patients with CF (48), a finding consistent with our sputum  
384 measurements here. Furthermore, the zinc-sequestering protein calprotectin is present in  
385 CF sputum in high concentrations (65, 66), potentially resulting in limited bioavailability of zinc  
386 for CF pathogens like *P. aeruginosa* (49). Thus, at present it is difficult to conclude how much  
387 of the increased zinc measured in CF sputum is actually available to the microbes; knowing  
388 the answer to this question is key to understanding disease progression. For example, based  
389 on *in vitro* studies, efficient zinc uptake is critical for *P. aeruginosa* to express several  
390 virulence traits associated with lung colonization, including swarming, swimming motility and  
391 the ability to form biofilms (49). It has been shown that high concentrations of total zinc are  
392 correlated with airway inflammation (48), indicating that perhaps *P. aeruginosa* can access  
393 some of the large pool of zinc in some circumstances. Furthermore, sputum zinc levels were  
394 found to decrease following antibiotic treatment of CF exacerbation (48, 49), again  
395 suggestive that loss of access to zinc reduces virulence. Interestingly, we found a possible  
396 relationship between the concentrations of zinc and relative abundance of *Pseudomonas* and  
397 *Streptococcus*, however, because of the relative abundance data available for this analysis,  
398 determining a statistical correlation is difficult. Nevertheless, we do note that at higher zinc  
399 measured concentrations, the relative abundance of *Streptococcus* appears to be lower than  
400 at low concentrations of this metal, which may be related to the toxicity observed when  
401 *Streptococcus* is grown in high levels of zinc, resulting in impaired growth or death (67).  
402 These data do suggest that increased total zinc may be associated with increased  
403 bioavailable zinc. A more detailed analysis of the physiology of zinc metabolism in CF sputum  
404 and measurements of the bioavailability of this metal will be required to definitely address the  
405 questions raised here, and these questions should be addressed in future studies.



## 406 MATERIALS AND METHODS

407 **Bacterial strains, plasmids and culture conditions.** Bacterial strains and plasmids used in  
408 this study are listed in Table S2. *S. sanguinis* SK36 and other clinical streptococcal isolates  
409 were grown statically in Bacto™ Todd-Hewitt (TH) broth supplemented with 0.5% (w/v) yeast  
410 extract (THY), or on Trypticase™ soy agar plates supplemented with 5% (v/v) defibrinated  
411 sheep blood (blood agar) at 37°C with 5% CO<sub>2</sub>. *P. aeruginosa* and *Escherichia coli* strains  
412 were grown in lysogeny broth (LB) medium (68) with shaking or on LB agar at 37°C unless  
413 otherwise noted. As indicated, the following antibiotics and concentrations were used: 500  
414 µg/ml kanamycin and 200 µg/ml spectinomycin for *S. sanguinis*; 50 µg/ml gentamycin and  
415 150 µg/ml carbenicillin for *P. aeruginosa*; 10 µg/ml gentamicin, 50 µg/ml carbenicillin and 100  
416 µg/ml spectinomycin for *E. coli*. For IPTG-inducible plasmids, IPTG was added to cultures to  
417 a 100 µM final concentration.

418 **Coculture assays.** Coculture assays were performed as previously described with minor  
419 modifications (8). Briefly, overnight cultures of *P. aeruginosa* and *Streptococcus* spp. were  
420 centrifuged at 13,000 × *g* for 3 min, washed twice with phosphate buffered saline (PBS), and  
421 resuspended in minimal essential medium (MEM) supplemented with 2 mM L-glutamine  
422 (MEM+L-Gln). For coculture samples, *P. aeruginosa* inoculum was prepared to an OD<sub>600</sub> of  
423 0.05 and *Streptococcus* spp. inoculum was prepared to an OD<sub>600</sub> of 0.001 in MEM+L-Gln. For  
424 monoculture controls, the inocula for *P. aeruginosa* or *Streptococcus* spp. were prepared to  
425 the same OD<sub>600</sub> as for the coculture samples. Three wells of a 96-well deep well plate were  
426 inoculated per monoculture and coculture condition with 400 µl per well. Culture plates were  
427 then incubated statically at 37°C with 5% CO<sub>2</sub> for 2 h, at which point the unattached  
428 planktonic cells were removed by aspiration and 400 µl of fresh MEM+L-Gln was once again  
429 added to each well. The cultures were then incubated for an additional 20 h, and both  
430 planktonic and biofilm cells were harvested together using a 96 pin replicator. Bacterial  
431 growth was determined by 10-fold serial dilutions in PBS and plated in 3 µl aliquots on

432 *Pseudomonas* isolation agar (PIA) or blood agar supplemented with 10 µg/ml neomycin and  
433 10 µg/ml polymixin B (SBA) for *P. aeruginosa* and *Streptococcus* spp. selective growth,  
434 respectively. After overnight incubation, bacterial colonies were counted and the colony  
435 forming units (CFU) per ml of culture were determined.

436 **Genetic screen of the SK36 library for mutants defective in growth enhancement.** To  
437 investigate *S. sanguinis* SK36 genes involved in *P. aeruginosa*-mediated enhancement of  
438 growth, the *S. sanguinis* SK36 non-essential gene mutant library (55) was screened for  
439 growth enhancement defects as previously described for *P. aeruginosa* with some  
440 modifications (8). Briefly, a 96 pin replicator was used to transfer inocula from the frozen  
441 library to a 96-well plate containing 150 µl of THY broth per well. The plate was then  
442 incubated statically for 24 h at 37°C with 5% CO<sub>2</sub>. The *P. aeruginosa* PAO1 culture was  
443 grown overnight in LB broth, adjusted to an OD<sub>600</sub> of 0.05 in MEM+L-Gln as described above,  
444 and 400 µl of this adjusted inoculum suspension was added to each well of a 96-well deep  
445 well plate. The 96 pin replicator was then used to transfer 2-3 µl of the 24 h culture from the  
446 mutant library plate into the 96-well deep well plate containing *P. aeruginosa* PAO1.  
447 Unattached bacteria were removed after 2 h, and 400 µl of fresh MEM+L-Gln was added to  
448 each well and the plates were grown for an additional 20 h at 37°C with 5% CO<sub>2</sub>. The 96 pin  
449 replicator was again used to disrupt the biofilms into the planktonic fraction, and large petri  
450 dish plates containing either PIA or SBA media were spot inoculated with each culture and  
451 grown as described above. Candidates that showed low or undetectable growth based on  
452 differences compared to the wild-type *S. sanguinis* SK36 (which formed small lawns when  
453 inoculated onto an agar plate by the 96 pin replicator) were stored at -80°C in 30% glycerol in  
454 a sterile 96-well plate. To confirm the phenotype, a second and third round of mutant  
455 screening was performed as described above.

456 **Kinetic growth assay.** The relative ability of *S. sanguinis* SK36 and *P. aeruginosa* PAO1 to  
457 grow in the coculture model system was determined by kinetic growth assays. Briefly, *S.*

458 *sanguinis* SK36 was grown in coculture with *P. aeruginosa* PAO1 as described above in a  
459 96-well deep well plate. The cultures were grown at 37°C with 5% CO<sub>2</sub> for 24 h, and were  
460 assessed for viable cell counts (CFU/ml) at seven time points: 0, 2, 4, 6, 8, 10, and 24 h. The  
461 0 h time point corresponds to the initial inoculum. Cells were collected at the 2 h time point  
462 prior to the 2 h medium replacement. At each time point, a combination of the planktonic and  
463 biofilm cells from triplicate wells were serially diluted and plated on PIA and SBA agar media,  
464 and CFU counts determined after overnight incubation as described above.

465 ***P. aeruginosa* supernatant assays.** To prepare *P. aeruginosa* conditioned medium,  
466 bacteria were grown in 0.5 ml per well of MEM+L-Gln in 24-well plates with media changes as  
467 described above. At the 22 h time point, the planktonic fractions were collected, centrifuged  
468 and supernatants were filter-sterilized through a 0.22 µm syringe filter. The effect of the  
469 sterile *P. aeruginosa* supernatants on the growth of *S. sanguinis* was tested on both plastic  
470 and CFBE monolayers. For experiments on plastic, supernatant with different levels of  
471 dilution in fresh MEM+L-Gln was added to *S. sanguinis* monocultures when the medium was  
472 replaced at the 2 h time point. For assays on CF airway cells, a 1/2 dilution of *P. aeruginosa*  
473 supernatant in MEM+L-Gln was supplemented with 0.4% L-arginine and gently added to  
474 each well of CF airway cells that had been cocultured with *S. sanguinis* for 1 h or 5.5 h when  
475 the medium was exchanged. *S. sanguinis* growth was evaluated after 22 h of incubation at  
476 37°C with 5% CO<sub>2</sub> as described above.

477 **Tissue culture cells and coculture on CFBE monolayers.** The cystic fibrosis bronchial  
478 epithelial (CFBE) monolayers used in the coculture model (54, 69) are immortalized cells that  
479 overexpress ΔF508-cystic fibrosis transmembrane conductance regulator (10, 70). CFBE  
480 monolayers were grown as previously described (10, 69). In brief, the CFBE monolayers

481 were seeded at a concentration of 100,000 cells/well in a 24-well tissue culture plate and fed  
482 every other day with MEM supplemented with 10% fetal bovine serum, 2 mM L-glutamine, 50  
483 U/ml penicillin, 50 µg/ml streptomycin, 2 µg/ml puromycin and 5 µg/ml Plasmocin. Cells were  
484 grown at 37°C with 5% CO<sub>2</sub> for 5-7 days to form a confluent monolayer and tight junctions  
485 before inoculation with bacteria. For coculture assays with mono- and dual-bacterial species,  
486 liquid cultures of *P. aeruginosa* and *Streptococcus* spp. were prepared as described above  
487 and 500 µl of bacterial inocula were gently added to triplicate wells of CFBE monolayers that  
488 had been washed twice with MEM. The cocultures were incubated at 37°C with 5% CO<sub>2</sub> for 1  
489 h, at which point unattached bacteria were removed by aspiration, 500 µl of MEM+L-Gln+0.4%  
490 L-arginine was added to each well and incubated for an additional 4.5 h. At this point,  
491 planktonic cells were removed by aspiration, and 500 µl of fresh MEM+L-Gln+0.4%  
492 L-arginine was once again added into each well. The established coculture was incubated for  
493 an additional 16.5 h. At 22 h post-inoculation, both planktonic and biofilm-grown bacteria  
494 were collected together by scraping with a pipette tip, and bacteria were serially diluted and  
495 plated on PIA and SBA plates, as described above, to identify *P. aeruginosa* and  
496 *Streptococcus* spp., respectively. Following overnight incubation, the resulting colonies were  
497 counted and the CFU/ml of the culture was determined.

498 **Zinc supplementation.** For zinc supplementation assays, wild-type *Streptococcus* SK36 and  
499 individual mutants with growth enhancement defects, wild-type *P. aeruginosa* PAO1 and *P.*  
500 *aeruginosa* PAO1 zinc homeostasis associated mutants were grown as described above for  
501 monoculture and coculture assays. After 2 h, unattached bacteria were removed by  
502 aspiration, MEM+L-Gln with or without additional zinc (at the indicated concentrations diluted  
503 from 1 mM zinc chloride stock solution in MEM+L-Gln) was added to each well and cocultures  
504 were then treated as described above. Nutritional complementation on CF airway cells were  
505 performed as described for biofilms on plastic, except that MEM+L-Gln supplemented with  
506 0.4% arginine (to enhance biofilm formation) with or without additional zinc chloride at the  
507 indicated concentration was used for medium exchange when indicated.

508 **Construction of mutants and complementation.** In-frame deletions of *P. aeruginosa*  
509 genes were constructed by allelic exchange employing the sucrose counter-selection system  
510 with the gene replacement vector pEX18Ap (71). Mutant strains were confirmed by PCR  
511 analysis of genomic DNA. *S. sanguinis* mutants were derived from a defined mutant library  
512 described previously (55). For complementation of each targeted *S. sanguinis* gene, a suicide  
513 vector pJFP126 was used to allow for the insertion of complementing genes into an ectopic  
514 chromosomal site (*SSA\_0169*) via homologous recombination and expression of each gene  
515 is under the control of an IPTG inducible promoter *hyper-spank* (8, 58). Transformation was  
516 performed essentially as described previously (72) with the competence stimulating peptide  
517 (CSP sequence: DLRGVPNPWGWIFGR) custom-synthesized by GenScript Inc. (Piscataway,  
518 NJ). Primers used for PCR amplification of selected genes are listed in Table S3.

519 **Expression studies.** For qRT-PCR studies, the overnight culture used as inoculum was  
520 prepared as described above from which three replicates cocultures of *P. aeruginosa* and *S.*  
521 *sanguinis*, or the *S. sanguinis* monoculture, were prepared in 100 ml of warm MEM+L-Gln in  
522 a 250 ml flask. The inoculum of *P. aeruginosa* and *S. sanguinis* was prepared and brought to  
523 an OD<sub>600</sub> of 0.05 and 0.02, respectively, as described above. Cultures were incubated at  
524 37°C with 5% CO<sub>2</sub>. After 2 h and 6 h of incubation, samples were pelleted, and bacterial cells  
525 were mechanically lysed with 10 cycles of 30 s bead beating, 30 s on ice with a 1:1 mixture of  
526 0.1 mm and 0.5 mm glass beads. Total RNA was isolated using TRIzol and the Direct-zol™  
527 RNA MiniPrep Kit with two times of in-column DNase I treatment according to the  
528 manufacturer's instructions (Zymo Research, R2053). RNA purity and concentration were  
529 determined using a NanoDrop 2000 spectrophotometer (Thermo Scientific). For each sample,  
530 1 µg of RNA was converted to cDNA using the SuperScript™ III First-Strand Synthesis  
531 System for RT-PCR (Invitrogen) and then diluted 1:50. qRT-PCR were carried out in triplicate  
532 in a StepOnePlus Real-Time PCR System (Applied Biosystems) using iTaq Universal SYBR  
533 Green Supermix (Bio-Rad). The qRT-PCR primers are listed in Table S3. Relative gene  
534 expression was calculated using the 2<sup>-ΔΔCT</sup> method with DNA gyrase subunit gene *gyrA* as a

535 normalization control for *S. sanguinis* (73, 74) and PA2875 as the reference gene for *P.*  
536 *aeruginosa* (75).

537 **Measurement of zinc in sputum samples.** Sputum samples for zinc analysis were stored at  
538  $-80^{\circ}\text{C}$  until processed. Sputum zinc was quantified by inductively coupled plasma-mass  
539 spectrometry (ICP-MS) following nitric acid digestion of organic material according to the  
540 method of Heck et al. and is expressed as micromolar zinc (60).

541 **Statistical Analysis.** Statistical analysis was performed using GraphPad Prism 7 program  
542 and results were expressed as the mean values  $\pm$  standard deviations. Unless otherwise  
543 noted, one-way analysis of variance (ANOVA) followed by Tukey's multiple comparison test  
544 or Student's *t*-test analysis was performed to determine statistical significance of the data. \*,  
545  $P < 0.05$ ; \*\*,  $P < 0.01$ . See figure legends or text for other specific statistical tests used.

546 **Acknowledgements.** This work was supported by grants from the Cystic Fibrosis  
547 Foundation (OTOOLE16GO) and NIH (R37 AI83256-06) to G.A.O, a China Scholarship  
548 Council (CSC) grant (201708330005) to K.L. T.H. is supported by the DartCF CF-BBC  
549 (P30-DK117469). We acknowledge support from the CF-Research Development Program  
550 [STANTO19R0] for the CFBE cells. The ICP-MS studies were performed by the Dartmouth  
551 Trace Element Analysis Core, funded by grant P42ES007373 from the National Institute of  
552 Health. We thank Brian Jackson for performing these studies. We also thank P. Xu for sharing  
553 the *S. sanguinis* mutant library.

554 **Literature Cited.**

- 555 1. Elborn J. 2016. Cystic fibrosis. *Lancet* 388:2519-2531.
- 556 2. Cutting GR. 2015. Cystic fibrosis genetics: from molecular understanding to clinical  
557 application. *Nat Rev Genet* 16:45-56.
- 558 3. Rowe SM, Miller S, Sorscher EJ. 2005. Cystic fibrosis. *N Engl J Med* 352:1992-2001.
- 559 4. Sibley CD, Parkins MD, Rabin HR, Duan K, Norgaard JC, Surette MG. 2008. A  
560 polymicrobial perspective of pulmonary infections exposes an enigmatic pathogen in  
561 cystic fibrosis patients. *Proc Natl Acad Sci U S A* 105:15070-5.
- 562 5. Sherrard LJ, Tunney MM, Elborn JS. 2014. Antimicrobial resistance in the respiratory  
563 microbiota of people with cystic fibrosis. *Lancet* 384:703-13.
- 564 6. Zhao J, Schloss PD, Kalikin LM, Carmody LA, Foster BK, Petrosino JF, Cavalcoli JD,  
565 VanDevanter DR, Murray S, Li JZ, Young VB, LiPuma JJ. 2012. Decade-long bacterial  
566 community dynamics in cystic fibrosis airways. *Proc Natl Acad Sci U S A* 109:5809-14.
- 567 7. Filkins LM, O'Toole GA. 2015. Cystic fibrosis lung infections: Polymicrobial, complex,  
568 and hard to treat. *PLoS Pathog* 11:e1005258.
- 569 8. Scott J, Li K, Filkins L, Zhu B, Kuchma S, Schwartzman J, O'Toole G. 2019.  
570 *Pseudomonas aeruginosa* can inhibit growth of streptococcal species via siderophore  
571 production. *J Bacteriol* 201:e00014-19.
- 572 9. Scofield JA, Duan D, Zhu F, Wu H. 2017. A commensal streptococcus hijacks a  
573 *Pseudomonas aeruginosa* exopolysaccharide to promote biofilm formation. *PLoS*  
574 *Pathog* 13:e1006300.

- 575 10. Price KE, Naimie AA, Griffin EF, Bay C, O'Toole GA. 2016. Tobramycin-treated  
576 *Pseudomonas aeruginosa* PA14 enhances *Streptococcus constellatus* 7155 biofilm  
577 formation in a cystic fibrosis model system. J Bacteriol 198:237-47.
- 578 11. Filkins LM, Hampton TH, Gifford AH, Gross MJ, Hogan DA, Sogin ML, Morrison HG,  
579 Paster BJ, O'Toole GA. 2012. Prevalence of streptococci and increased polymicrobial  
580 diversity associated with cystic fibrosis patient stability. J Bacteriol 194:4709-17.
- 581 12. Scoffield JA, Wu H. 2015. Oral streptococci and nitrite-mediated interference of  
582 *Pseudomonas aeruginosa*. Infect Immun 83:101-7.
- 583 13. Scoffield JA, Wu H. 2016. Nitrite reductase is critical for *Pseudomonas aeruginosa*  
584 survival during co-infection with the oral commensal *Streptococcus parasanguinis*.  
585 Microbiology-Sgm 162:376-383.
- 586 14. Bastaert F, Kheir S, Saint-Criq V, Villeret B, Dang PM, El-Benna J, Sirard JC,  
587 Voulhoux R, Sallenave JM. 2018. *Pseudomonas aeruginosa* LasB subverts alveolar  
588 macrophage activity by interfering with bacterial killing through downregulation of  
589 innate immune defense, reactive oxygen species generation, and complement  
590 activation. Front Immunol 9:1675.
- 591 15. Sibley CD, Grinwis ME, Field TR, Parkins MD, Norgaard JC, Gregson DB, Rabin HR,  
592 Surette MG. 2010. McKay agar enables routine quantification of the '*Streptococcus*  
593 *milleri*' group in cystic fibrosis patients. J Med Microbiol 59:534-40.



- 594 16. Scott JE, O'Toole GA. 2019. The yin and yang of *Streptococcus* lung infections in  
595 cystic fibrosis: a model for studying polymicrobial interactions. *J Bacteriol*  
596 201:e00115-19.
- 597 17. Dennis EA, Coats MT, Griffin S, Pang B, Briles DE, Crain MJ, Swords WE. 2018.  
598 Hyperencapsulated mucoid pneumococcal isolates from patients with cystic fibrosis  
599 have increased biofilm density and persistence in vivo. *Pathog Dis* 76: doi:  
600 10.1093/femspd/fty073.
- 601 18. Acosta N, Whelan FJ, Somayaji R, Poonja A, Surette MG, Rabin HR, Parkins MD.  
602 2017. The evolving cystic fibrosis microbiome: A comparative cohort study spanning  
603 16 years. *Ann Am Thorac Soc* 14:1288-1297.
- 604 19. Flight WG, Smith A, Paisey C, Marchesi JR, Bull MJ, Norville PJ, Mutton KJ, Webb AK,  
605 Bright-Thomas RJ, Jones AM, Mahenthiralingam E. 2015. Rapid detection of  
606 emerging pathogens and loss of microbial diversity associated with severe lung  
607 disease in cystic fibrosis. *J Clin Microbiol* 53:2022-9.
- 608 20. Acosta N, Heirali A, Somayaji R, Surette MG, Workentine ML, Sibley CD, Rabin HR,  
609 Parkins MD. 2018. Sputum microbiota is predictive of long-term clinical outcomes in  
610 young adults with cystic fibrosis. *Thorax* 73:1016-1025.
- 611 21. Coburn B, Wang PW, Diaz Caballero J, Clark ST, Brahma V, Donaldson S, Zhang Y,  
612 Surendra A, Gong Y, Elizabeth Tullis D, Yau YC, Waters VJ, Hwang DM, Guttman DS.  
613 2015. Lung microbiota across age and disease stage in cystic fibrosis. *Sci Rep*  
614 5:10241.

- 615 22. Andreini C, Banci L, Bertini I, Rosato A. 2006. Zinc through the three domains of life.  
616 Journal of Proteome Research 5:3173-3178.
- 617 23. Finney LA, O'Halloran TV. 2003. Transition metal speciation in the cell: Insights from  
618 the chemistry of metal ion receptors. Science 300:931-936.
- 619 24. Mikhaylina A, Ksibe AZ, Scanlan DJ, Blindauer CA. 2018. Bacterial zinc uptake  
620 regulator proteins and their regulons. Biochem Soc Trans 46:983-1001.
- 621 25. McDevitt CA, Ogunniyi AD, Valkov E, Lawrence MC, Kobe B, McEwan AG, Paton JC.  
622 2011. A molecular mechanism for bacterial susceptibility to zinc. PLoS Pathog  
623 7:e1002357.
- 624 26. Yamamoto K, Ishihama A. 2005. Transcriptional response of *Escherichia coli* to  
625 external zinc. J Bacteriol 187:6333-6340.
- 626 27. Hantke K. 2005. Bacterial zinc uptake and regulators. Curr Opin Microbiol 8:196-202.
- 627 28. Porcheron G, Garenaux A, Proulx J, Sabri M, Dozois CM. 2013. Iron, copper, zinc, and  
628 manganese transport and regulation in pathogenic Enterobacteria: correlations  
629 between strains, site of infection and the relative importance of the different metal  
630 transport systems for virulence. Front Cell Infect Microbiol 3:e00090.
- 631 29. Poole K, Hay T, Gilmour C, Fruci M. 2019. The aminoglycoside resistance-promoting  
632 AmgRS envelope stress-responsive two-component system in *Pseudomonas*  
633 *aeruginosa* is zinc-activated and protects cells from zinc-promoted membrane  
634 damage. Microbiology 165:563-571.

- 635 30. Kehl-Fie TE, Skaar EP. 2010. Nutritional immunity beyond iron: a role for manganese  
636 and zinc. *Curr Opin Chem Biol* 14:218-24.
- 637 31. Ong CL, Gillen CM, Barnett TC, Walker MJ, McEwan AG. 2014. An antimicrobial role  
638 for zinc in innate immune defense against group A streptococcus. *J Infect Dis*  
639 209:1500-8.
- 640 32. Botella H, Peyron P, Levillain F, Poincloux R, Poquet Y, Brandli I, Wang C, Tailleux L,  
641 Tilleul S, Charriere GM, Waddell SJ, Foti M, Lugo-Villarino G, Gao Q,  
642 Maridonneau-Parini I, Butcher PD, Castagnoli PR, Gicquel B, de Chastellier C,  
643 Neyrolles O. 2011. Mycobacterial p(1)-type ATPases mediate resistance to zinc  
644 poisoning in human macrophages. *Cell Host Microbe* 10:248-59.
- 645 33. Blencowe DK, Morby AP. 2003. Zn(II) metabolism in prokaryotes. *FEMS Microbiol Rev*  
646 27:291-311.
- 647 34. Capdevila DA, Wang J, Giedroc DP. 2016. Bacterial strategies to maintain zinc  
648 metallostasis at the host-pathogen interface. *J Biol Chem* 291:20858-20868.
- 649 35. Pederick VG, Eijkelkamp BA, Begg SL, Ween MP, McAllister LJ, Paton JC, McDevitt  
650 CA. 2015. ZnuA and zinc homeostasis in *Pseudomonas aeruginosa*. *Sci Rep* 5:13139.
- 651 36. Gonzalez MR, Ducret V, Leoni S, Perron K. 2019. *Pseudomonas aeruginosa* zinc  
652 homeostasis: Key issues for an opportunistic pathogen. *Biochim Biophys Acta Gene  
653 Regul Mech* 1862:722-733.

- 654 37. Ellison ML, Farrow JM, 3rd, Parrish W, Danell AS, Pesci EC. 2013. The transcriptional  
655 regulator Np20 is the zinc uptake regulator in *Pseudomonas aeruginosa*. PLoS ONE  
656 8:e75389.
- 657 38. Lhospice S, Gomez NO, Ouerdane L, Brutesco C, Ghssein G, Hajjar C, Liratni A,  
658 Wang SL, Richaud P, Bleves S, Ball G, Borezee-Durant E, Lobinski R, Pignol D,  
659 Arnoux P, Voulhoux R. 2017. *Pseudomonas aeruginosa* zinc uptake in chelating  
660 environment is primarily mediated by the metallophore pseudopaline. Scientific  
661 Reports 7:17132.
- 662 39. Mastropasqua MC, D'Orazio M, Cerasi M, Pacello F, Gismondi A, Canini A, Canuti L,  
663 Consalvo A, Ciavardelli D, Chirullo B, Pasquali P, Battistoni A. 2017. Growth of  
664 *Pseudomonas aeruginosa* in zinc poor environments is promoted by a  
665 nicotianamine-related metallophore. Mol Microbiol 106:543-561.
- 666 40. Patzer SI, Hantke K. 1998. The ZnuABC high-affinity zinc uptake system and its  
667 regulator Zur in *Escherichia coli*. Mol Microbiol 28:1199-210.
- 668 41. Outten CE, O'Halloran TV. 2001. Femtomolar sensitivity of metalloregulatory proteins  
669 controlling zinc homeostasis. Science 292:2488-92.
- 670 42. Shafeeq S, Kuipers OP, Kloosterman TG. 2013. The role of zinc in the interplay  
671 between pathogenic streptococci and their hosts. Mol Microbiol 88:1047-1057.
- 672 43. Makthal N, Kumaraswami M. 2017. Zinc'ing it out: zinc homeostasis mechanisms and  
673 their impact on the pathogenesis of human pathogen group A streptococcus.  
674 Metallomics 9:1693-1702.

- 675 44. Plumptre CD, Eijkelkamp BA, Morey JR, Behr F, Counago RM, Ogunniyi AD, Kobe B,  
676 O'Mara ML, Paton JC, McDevitt CA. 2014. AdcA and AdcAll employ distinct zinc  
677 acquisition mechanisms and contribute additively to zinc homeostasis in  
678 *Streptococcus pneumoniae*. Mol Microbiol 91:834-51.
- 679 45. Moulin P, Patron K, Cano C, Zorgani MA, Camiade E, Borezee-Durant E, Rosenau A,  
680 Mereghetti L, Hiron A. 2016. The Adc/Lmb system mediates zinc acquisition in  
681 *Streptococcus agalactiae* and contributes to bacterial growth and survival. J Bacteriol  
682 198:3265-3277.
- 683 46. Linke C, Caradoc-Davies TT, Young PG, Proft T, Baker EN. 2009. The laminin-binding  
684 protein Lbp from *Streptococcus pyogenes* is a zinc receptor. J Bacteriol 191:5814-23.
- 685 47. Panina EM, Mironov AA, Gelfand MS. 2003. Comparative genomics of bacterial zinc  
686 regulons: enhanced ion transport, pathogenesis, and rearrangement of ribosomal  
687 proteins. Proc Natl Acad Sci U S A 100:9912-7.
- 688 48. Gray RD, Duncan A, Noble D, Imrie M, O'Reilly DS, Innes JA, Porteous DJ, Greening  
689 AP, Boyd AC. 2010. Sputum trace metals are biomarkers of inflammatory and  
690 suppurative lung disease. Chest 137:635-41.
- 691 49. Mastropasqua MC, Lamont I, Martin LW, Reid DW, D'Orazio M, Battistoni A. 2018.  
692 Efficient zinc uptake is critical for the ability of *Pseudomonas aeruginosa* to express  
693 virulence traits and colonize the human lung. Journal of Trace Elements in Medicine  
694 and Biology 48:74-80.

- 695 50. Makthal N, Nguyen K, Do H, Gavagan M, Chandrangsu P, Helmann JD, Olsen RJ,  
696 Kumaraswami M. 2017. A critical role of zinc importer AdcABC in Group A  
697 Streptococcus-host interactions during infection and its implications for vaccine  
698 development. *Ebiomedicine* 21:131-141.
- 699 51. Britigan BE, Railsback MA, Cox CD. 1999. The *Pseudomonas aeruginosa* secretory  
700 product pyocyanin inactivates alpha1 protease inhibitor: implications for the  
701 pathogenesis of cystic fibrosis lung disease. *Infect Immun* 67:1207-12.
- 702 52. Lyczak JB, Cannon CL, Pier GB. 2000. Establishment of *Pseudomonas aeruginosa*  
703 infection: lessons from a versatile opportunist. *Microbes Infect* 2:1051-60.
- 704 53. Gallagher LA, Manoil C. 2001. *Pseudomonas aeruginosa* PAO1 kills *Caenorhabditis*  
705 *elegans* by cyanide poisoning. *J Bacteriol* 183:6207-6214.
- 706 54. Anderson GG, Moreau-Marquis S, Stanton BA, O'Toole GA. 2008. In vitro analysis of  
707 tobramycin-treated *Pseudomonas aeruginosa* biofilms on cystic fibrosis-derived  
708 airway epithelial cells. *Infect Immun* 76:1423-33.
- 709 55. Xu P, Ge X, Chen L, Wang X, Dou Y, Xu JZ, Patel JR, Stone V, Trinh M, Evans K,  
710 Kitten T, Bonchev D, Buck GA. 2011. Genome-wide essential gene identification in  
711 *Streptococcus sanguinis*. *Sci Rep* 1:125.
- 712 56. Das S, Kanamoto T, Ge X, Xu P, Unoki T, Munro CL, Kitten T. 2009. Contribution of  
713 lipoproteins and lipoprotein processing to endocarditis virulence in *Streptococcus*  
714 *sanguinis*. *J Bacteriol* 191:4166-79.

- 715 57. Crump KE, Bainbridge B, Brusko S, Turner LS, Ge X, Stone V, Xu P, Kitten T. 2014.  
716 The relationship of the lipoprotein SsaB, manganese and superoxide dismutase in  
717 *Streptococcus sanguinis* virulence for endocarditis. Mol Microbiol 92:1243-59.
- 718 58. Rhodes DV, Crump KE, Makhlynets O, Snyder M, Ge X, Xu P, Stubbe J, Kitten T.  
719 2014. Genetic characterization and role in virulence of the ribonucleotide reductases of  
720 *Streptococcus sanguinis*. J Biol Chem 289:6273-87.
- 721 59. Gifford AH, Alexandru DM, Li Z, Dorman DB, Moulton LA, Price KE, Hampton TH,  
722 Sogin ML, Zuckerman JB, Parker HW, Stanton BA, O'Toole GA. 2014. Iron  
723 supplementation does not worsen respiratory health or alter the sputum microbiome in  
724 cystic fibrosis. J Cyst Fibros 13:311-8.
- 725 60. Heck JE, Andrew AS, Onega T, Rigas JR, Jackson BP, Karagas MR, Duell EJ. 2009.  
726 Lung cancer in a U.S. population with low to moderate arsenic exposure. Environ  
727 Health Perspect 117:1718-23.
- 728 61. Carr A, Diener C, Baliga NS, Gibbons SM. 2019. Use and abuse of correlation  
729 analyses in microbial ecology. ISME J doi:10.1038/s41396-019-0459-z.
- 730 62. Knight R, Vrbanac A, Taylor BC, Aksenov A, Callewaert C, Debelius J, Gonzalez A,  
731 Kosciolk T, McCall LI, McDonald D, Melnik AV, Morton JT, Navas J, Quinn RA,  
732 Sanders JG, Swafford AD, Thompson LR, Tripathi A, Xu ZZ, Zaneveld JR, Zhu Q,  
733 Caporaso JG, Dorrestein PC. 2018. Best practices for analysing microbiomes. Nat  
734 Rev Microbiol 16:410-422.

- 735 63. Whiley RA, Fleming EV, Makhija R, Waite RD. 2015. Environment and colonisation  
736 sequence are key parameters driving cooperation and competition between  
737 *Pseudomonas aeruginosa* cystic fibrosis strains and oral commensal streptococci.  
738 PLoS One 10:e0115513.
- 739 64. Jayaram L, Chunilal S, Pickering S, Ruffin RE, Zalewski PD. 2011. Sputum zinc  
740 concentration and clinical outcome in older asthmatics. *Respirology* 16:459-66.
- 741 65. Gray RD, Imrie M, Boyd AC, Porteous D, Innes JA, Greening AP. 2010. Sputum and  
742 serum calprotectin are useful biomarkers during CF exacerbation. *J Cyst Fibros*  
743 9:193-8.
- 744 66. Gray RD, MacGregor G, Noble D, Imrie M, Dewar M, Boyd AC, Innes JA, Porteous DJ,  
745 Greening AP. 2008. Sputum proteomics in inflammatory and suppurative respiratory  
746 diseases. *Am J Respir Crit Care Med* 178:444-52.
- 747 67. Ong CL, Walker MJ, McEwan AG. 2015. Zinc disrupts central carbon metabolism and  
748 capsule biosynthesis in *Streptococcus pyogenes*. *Sci Rep* 5:10799.
- 749 68. Bertani G. 2004. Lysogeny at mid-twentieth century: P1, P2, and other experimental  
750 systems. *J Bacteriol* 186:595-600.
- 751 69. Moreau-Marquis S, Redelman CV, Stanton BA, Anderson GG. 2010. Co-culture  
752 models of *Pseudomonas aeruginosa* biofilms grown on live human airway cells. *J Vis*  
753 *Exp* doi:10.3791/2186.



- 754 70. Hentchel-Franks K, Lozano D, Eubanks-Tarn V, Cobb B, Fan L, Oster R, Sorscher E,  
755 Clancy JP. 2004. Activation of airway Cl<sup>-</sup> secretion in human subjects by adenosine.  
756 *Am J Respir Cell Mol Biol* 31:140-6.
- 757 71. Hoang TT, Karkhoff-Schweizer RR, Kutchma AJ, Schweizer HP. 1998. A  
758 broad-host-range Flp-FRT recombination system for site-specific excision of  
759 chromosomally-located DNA sequences: application for isolation of unmarked  
760 *Pseudomonas aeruginosa* mutants. *Gene* 212:77-86.
- 761 72. Chen L, Ge X, Xu P. 2015. Identifying essential *Streptococcus sanguinis* genes using  
762 genome-wide deletion mutation. *Methods Mol Biol* 1279:15–23.
- 763 73. Zhu B, Ge X, Stone V, Kong X, El-Rami F, Liu Y, Kitten T, Xu P. 2017. *ciaR* impacts  
764 biofilm formation by regulating an arginine biosynthesis pathway in *Streptococcus*  
765 *sanguinis* SK36. *Sci Rep* 7:17183.
- 766 74. Zhu L, Zhang Y, Fan J, Herzberg MC, Kreth J. 2011. Characterization of competence  
767 and biofilm development of a *Streptococcus sanguinis* endocarditis isolate. *Mol Oral*  
768 *Microbiol* 26:117-26.
- 769 75. Costaglioli P, Barthe C, Fayon M, Christoflour N, Bui S, Derlich L, Domblides P,  
770 Crouzet M, Vilain S, Garbay B. 2014. Selection of *Pseudomonas aeruginosa* reference  
771 genes for RT-qPCR analysis from sputum of cystic fibrosis patients. *Mol Cell Probes*  
772 28:10-2.
- 773
- 774

775 **FIGURE LEGENDS**

776 **Figure 1. *P. aeruginosa* can stimulate the growth of *S. sanguinis* when grown in**  
777 **co-cultures.** (A and B) Growth kinetics of *S. sanguinis* SK36 (labeled SK36) and *P.*  
778 *aeruginosa* PAO1 (labeled PAO1) in a 96-well deep well plate either in coculture or as a  
779 monoculture. (C-D) *P. aeruginosa* cells or a 1:2 dilution of *P. aeruginosa* supernatant (super)  
780 enhances *S. sanguinis* growth in coculture on a plastic substratum (C) or CFBE monolayers  
781 (D). Error bars indicate standard deviation of the means from a representative triplicate assay.  
782 (\*\*,  $P < 0.01$ , Student's *t*-test).

783 **Figure 2. Identification of *S. sanguinis* SK36 mutants that exhibits reduced growth**  
784 **enhancement mediated by *P. aeruginosa*.** (A) Schematic diagram of the genome-wide  
785 screen of *S. sanguinis* SK36 mutant library. (B) Functional classification of screen hits using  
786 KEGG Orthology (KO) database shown here as the number of candidate mutants identified in  
787 each of the indicated pathways. (C) Genes required for zinc uptake identified in the screen and  
788 corresponding functions ([https://www.genome.jp/dbget-bin/get\\_linkdb?-t+genes+gn:T00473](https://www.genome.jp/dbget-bin/get_linkdb?-t+genes+gn:T00473)).

789 **Figure 3. Zinc is required for the *P. aeruginosa*-induced enhancement of *S. sanguinis***  
790 **growth.** (A) Growth of wild-type *S. sanguinis* and zinc transporter mutants with *P. aeruginosa*  
791 (expressed as CFU/ml) in media with or without addition of zinc at the indicated concentration.  
792 Statistical significance was assessed by one-way ANOVA with a Turkey's multiple comparison,  
793 and different letters indicates statistically significant differences ( $P < 0.05$ ). Identical letters  
794 indicate no significant difference. In this and all subsequent panels, the SSA designation  
795 indicates the wild-type gene, while the Ssx designation indicates a mutation in that gene, using  
796 the convention reported in the original description of these mutant strains (55). (B)  
797 Complementation assays with the zinc transporter mutant strains. Significant differences in  
798 growth compared to the uncomplemented vector control are indicated (\*,  $P < 0.05$ ; \*\*,  $P <$   
799  $0.01$ , Student's *t*-test). (C) Growth of indicated *S. sanguinis* strains with *P. aeruginosa* on CF  
800 airway cells in the presence or absence of 1  $\mu$ M zinc. Statistical significance was determined

801 by one-way ANOVA with a Turkey's multiple comparison. Different letters indicates  
802 statistically significant differences ( $P < 0.05$ ). Identical letters indicate no significant difference.  
803 (D) Growth of indicated *S. sanguinis* strains in monoculture on CF airway cells in the presence  
804 or absence of 1  $\mu\text{M}$  zinc. Data are representative of three experiments performed in triplicate,  
805 and none of the differences are significant.

806 **Figure 4. *S. sanguinis* zinc transporter genes are upregulated in the presence of *P.***  
807 ***aeruginosa*.** (A) Relative mRNA expression of *S. sanguinis* zinc transporter genes in  
808 monoculture and coculture with *P. aeruginosa* at 2 h and 6 h. The relative mRNA expression  
809 was measured using qRT-PCR, normalized to the expression of the *gyrA* control, and  
810 calculated using the  $2^{-\Delta\Delta\text{CT}}$  method setting the value of SK36 (2 h) as one. (B) Relative  
811 expression of *S. sanguinis* zinc transporter genes at 6 h in monoculture and coculture with *P.*  
812 *aeruginosa* with or without zinc (1  $\mu\text{M}$ ) supplementation. Error bars represent deviations of the  
813 means. ANOVA with Turkey's multiple comparison test was used for statistical analysis (\*\*,  $P$   
814  $< 0.01$ ).

815 **Figure 5. Analysis of zinc transporter mutants.** (A-C) Growth of *S. sanguinis* SK36 with *P.*  
816 *aeruginosa* PAO1 wild type and indicated mutant strains in coculture. The strains tested carry  
817 deletion mutations in the *cntI* (A), *znuA* (B) and *cntI-O* (C) genes of *P. aeruginosa* PAO1. (D-E)  
818 Growth of *S. sanguinis* SK36 (D) and *P. aeruginosa* wild-type and  $\Delta\text{zurA}$  mutants (E) in  
819 coculture assays in MEM (no added zinc) or with 10  $\mu\text{M}$  of added zinc. ANOVA with Turkey's  
820 multiple comparison test was used for statistical analysis (\*\*,  $P < 0.01$ ) in panel D. There were  
821 no significant differences in panel E. SK36, *S. sanguinis* SK36 and PAO1, *P. aeruginosa*  
822 PAO1.

823 **Figure 6. The relationship between sputum zinc concentration and the relative**  
824 **abundance of *Streptococcus* and *Pseudomonas*.** The relative abundance of  
825 *Streptococcus* (orange dots, left Y axis) and *Pseudomonas* (blue dots, right Y axis) in each  
826 sputum sample (indicated as a fraction of 100%) is plotted versus the concentration of zinc in

827 the corresponding sample (expressed as  $\mu\text{M}$  zinc on the X-axis). Total zinc was measured  
828 by ICP-MS analysis of nitrate acid-dissolved samples and normalized to the volume of the  
829 sample.

830 **Figure 7. Impact of zinc level on viability of *Streptococcus* in monoculture and**  
831 **coculture with *Pseudomonas*.** Growth of the indicated streptococci (expressed as CFU/ml)  
832 when grown in monoculture (A) or coculture with *P. aeruginosa* PAO1 (B) at the indicated  
833 concentration of supplemented zinc chloride. The 0 addition has only the zinc present in the  
834 medium ( $0.024 \pm 0.007 \mu\text{M}$ ). The other zinc additions were based on the data shown in Fig. S5  
835 and indicate the lowest ( $4.7 \mu\text{M}$ ), median ( $36.4 \mu\text{M}$ ) and highest concentration ( $145 \mu\text{M}$ ) of zinc  
836 found in the 118 sputum samples analysed. Statistical significance was determined by  
837 one-way ANOVA with a Turkey's multiple comparison. Different letters indicates statistically  
838 significant differences ( $P < 0.05$ ). Identical letters indicate no significant difference.

839

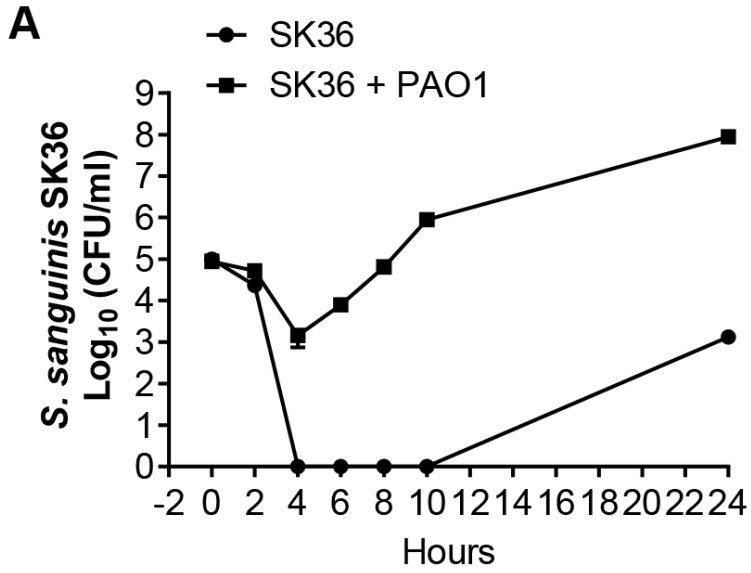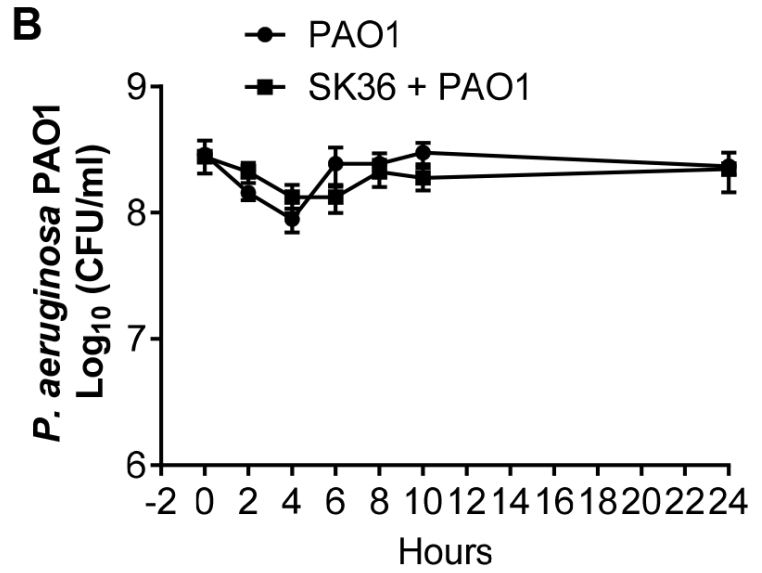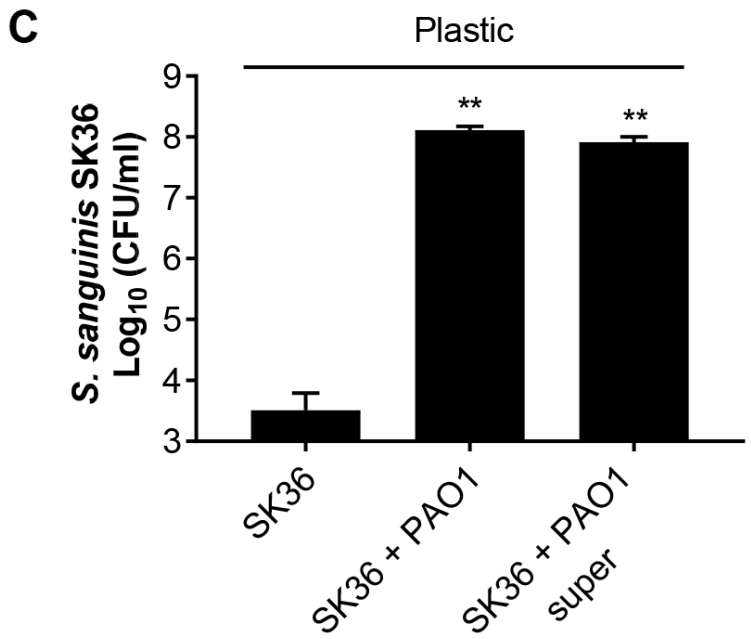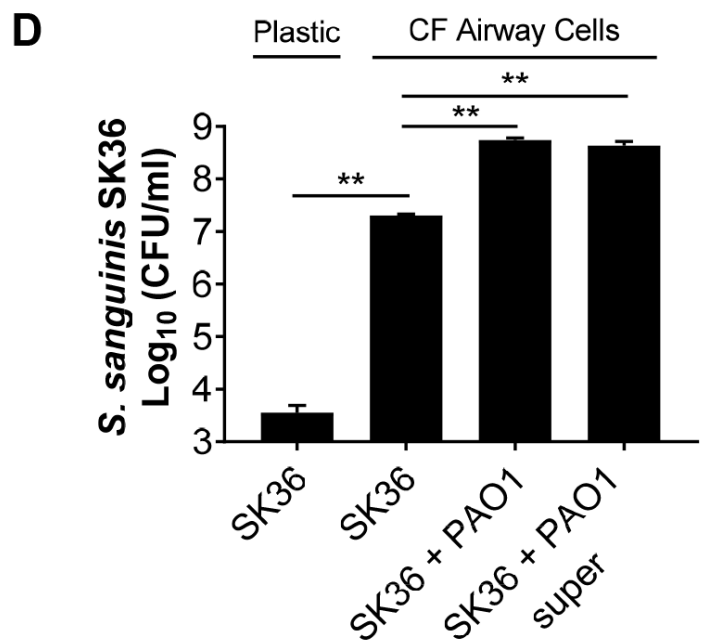

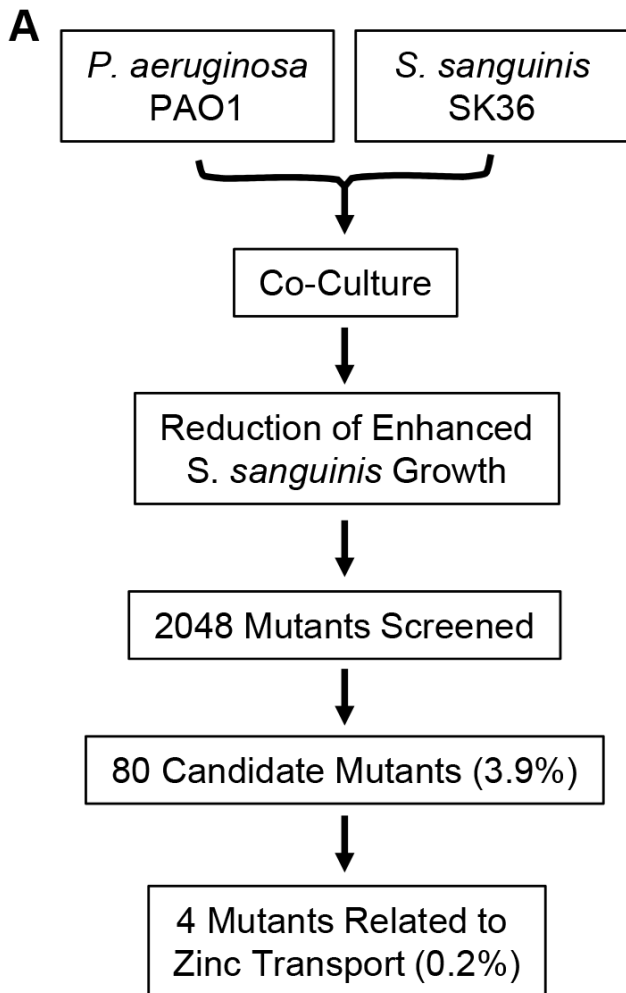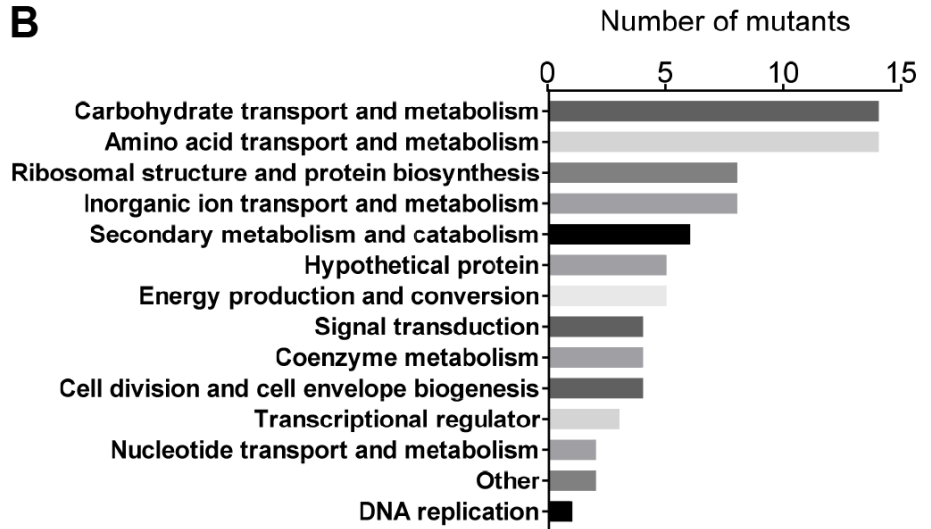

**C**

| Gene #          | Predicted Function                                                                |
|-----------------|-----------------------------------------------------------------------------------|
| <b>SSA_0136</b> | ABC transporter, ATP-binding protein, Zn porter                                   |
| <b>SSA_0137</b> | ABC transporter (permease), Zn porter                                             |
| <b>SSA_0260</b> | manganese/Zinc ABC transporter substrate-binding protein                          |
| <b>SSA_0261</b> | ABC-type Mn <sup>2+</sup> /Zn <sup>2+</sup> transport systems, permease component |

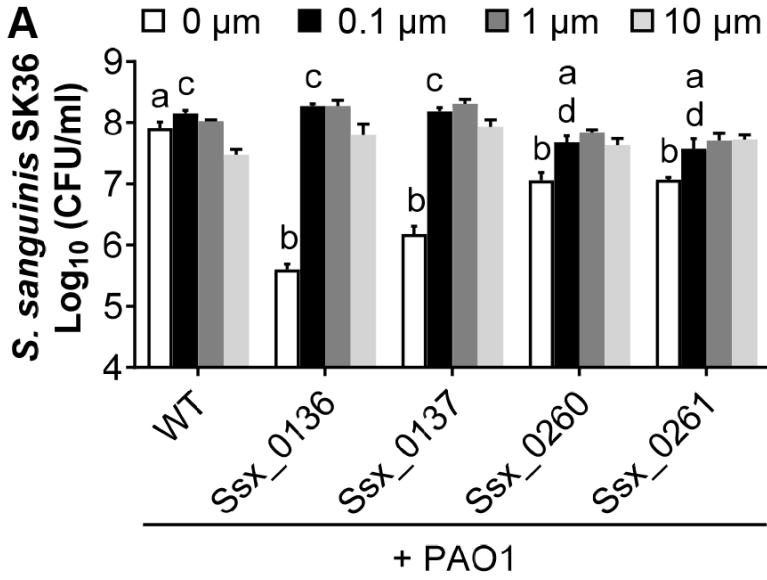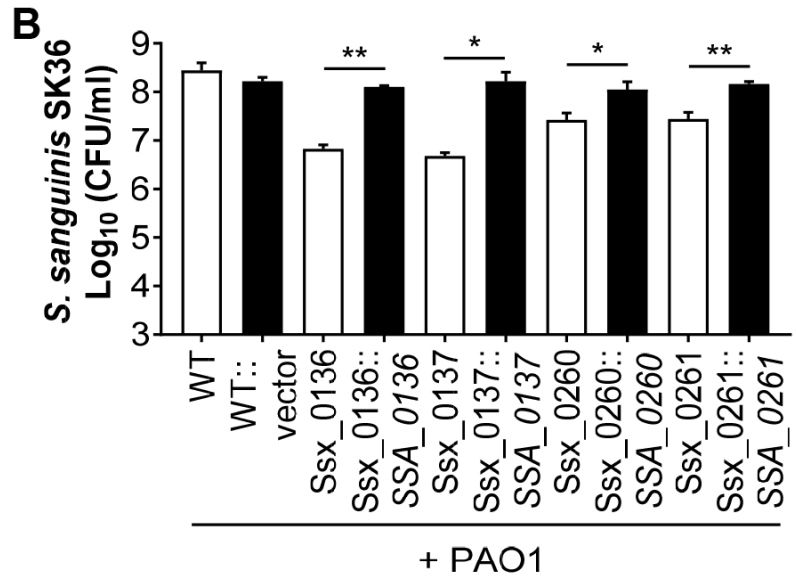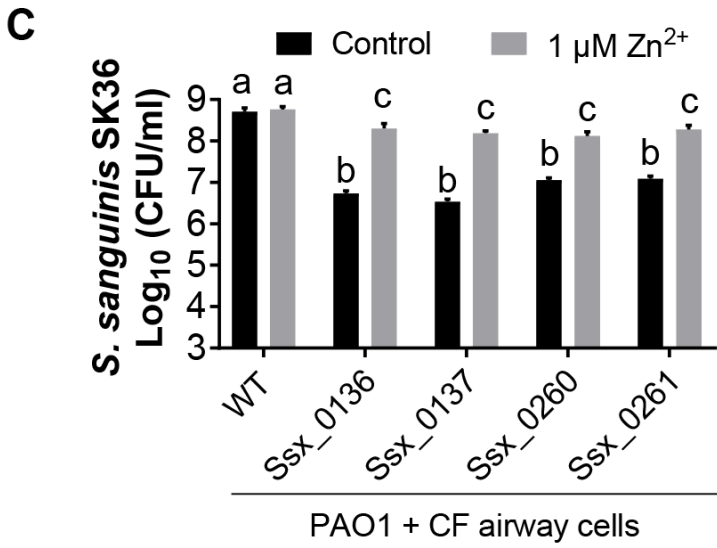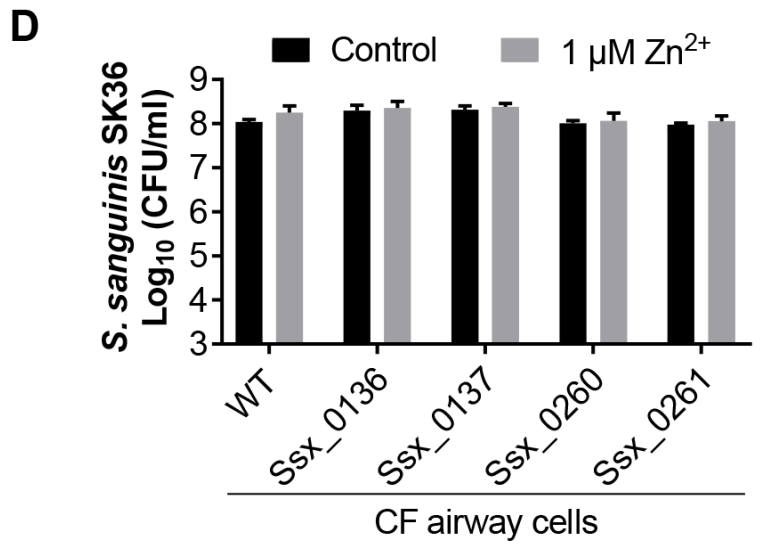

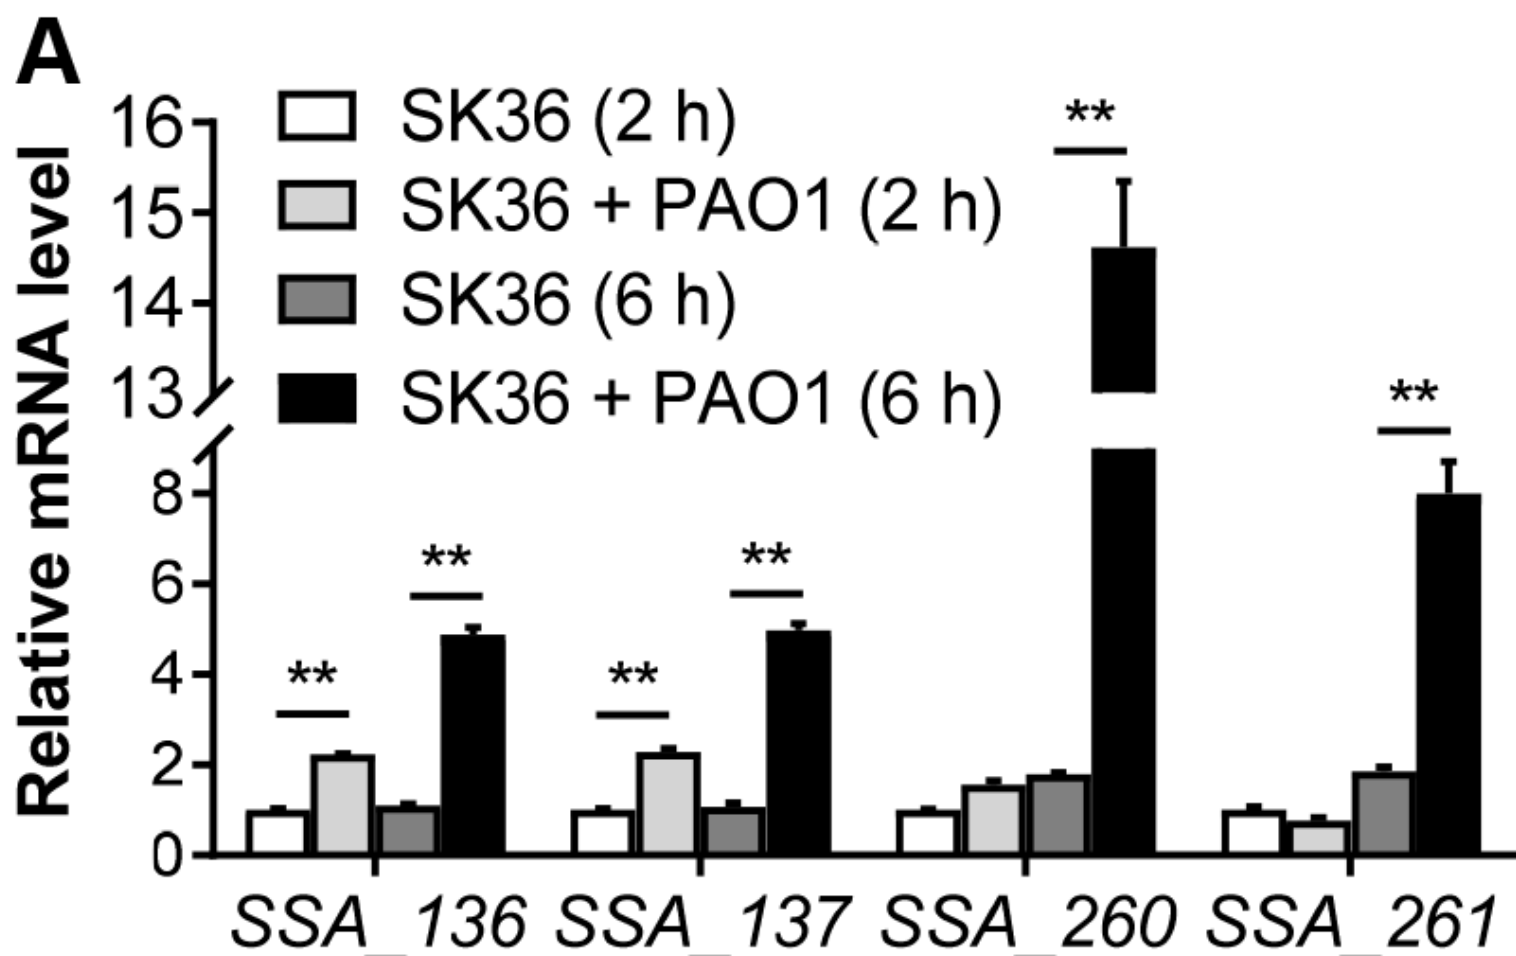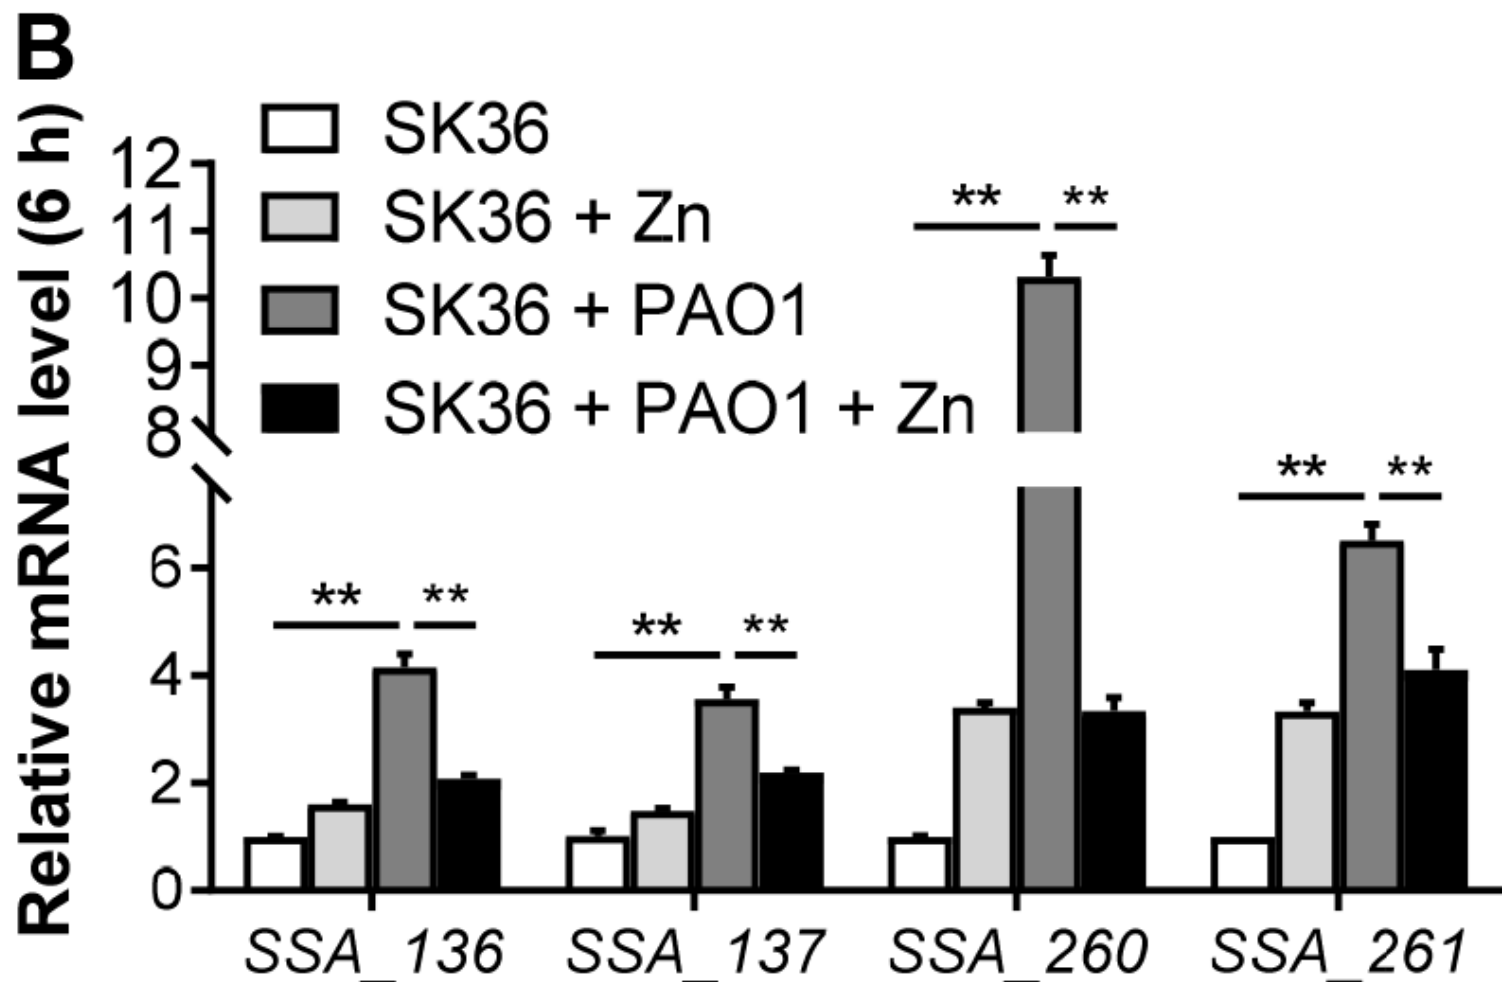



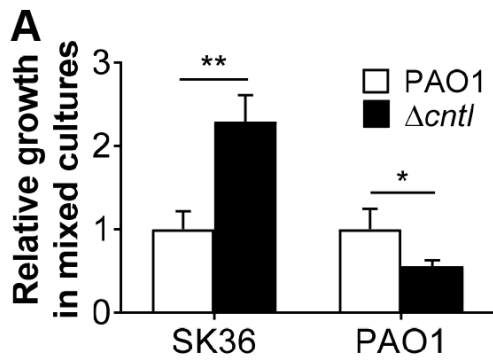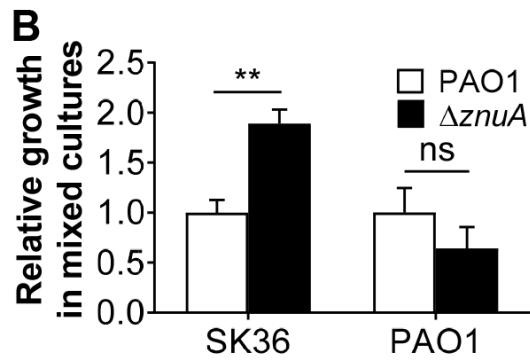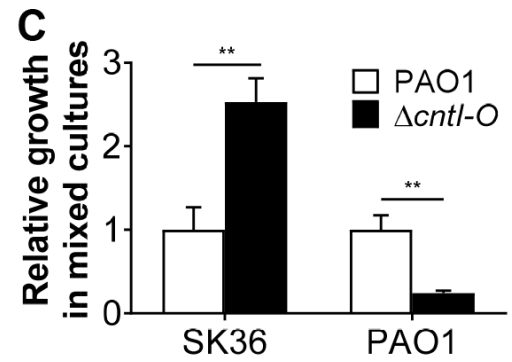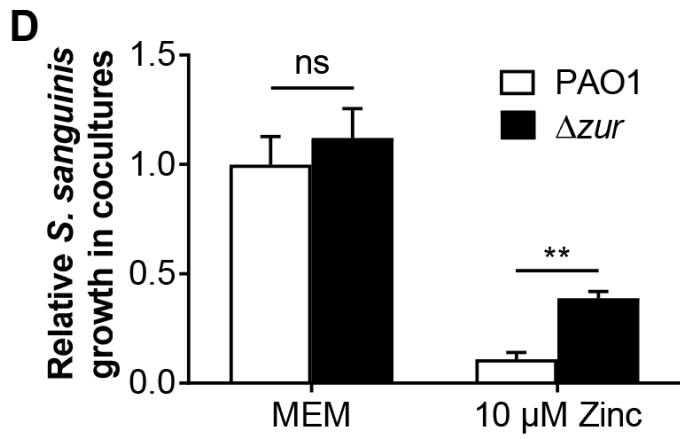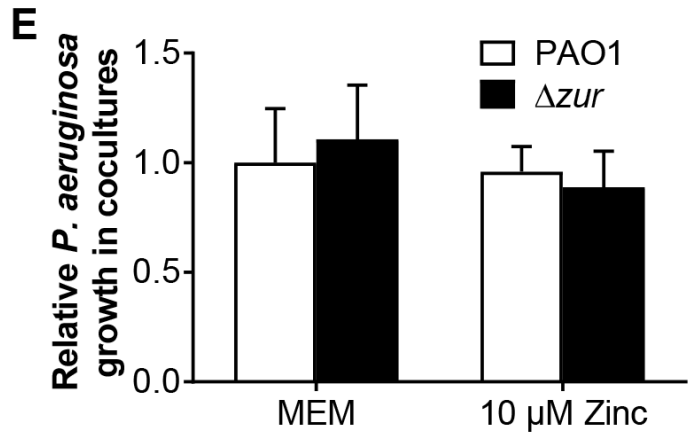

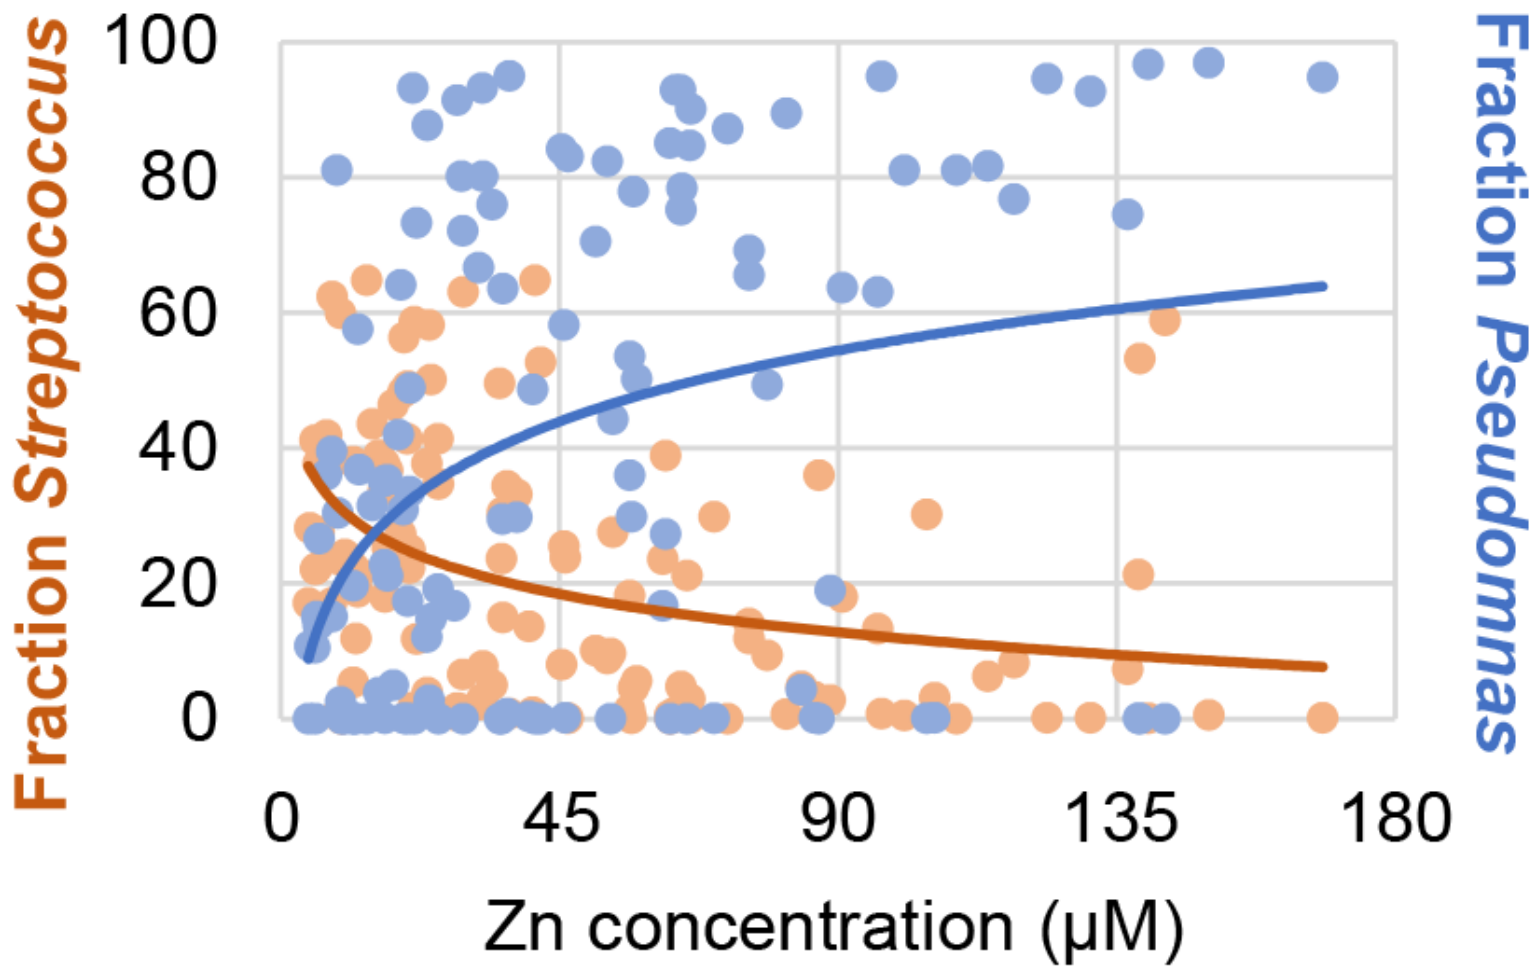

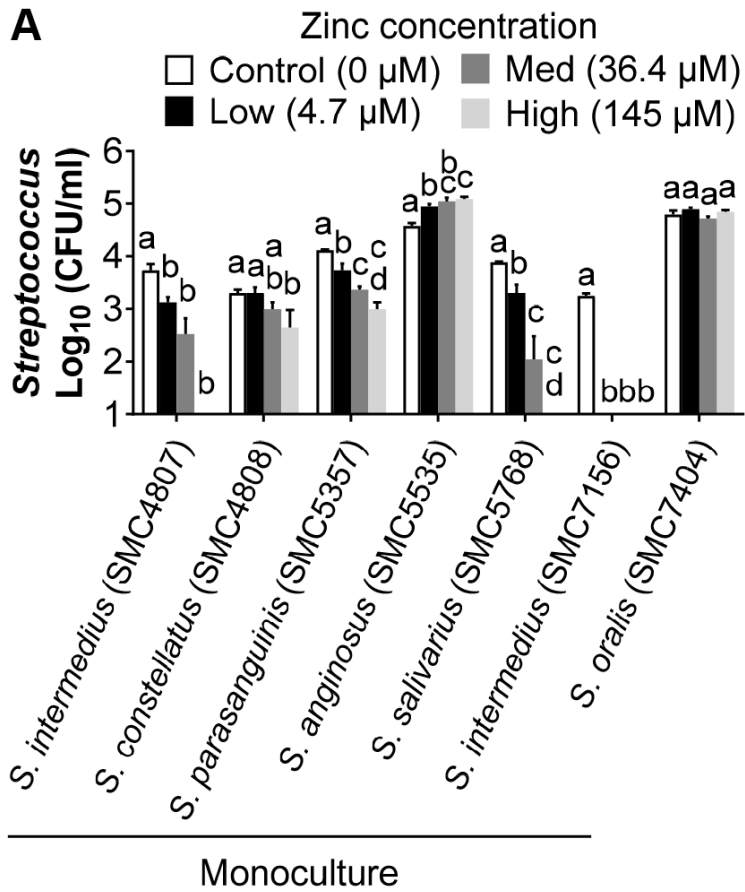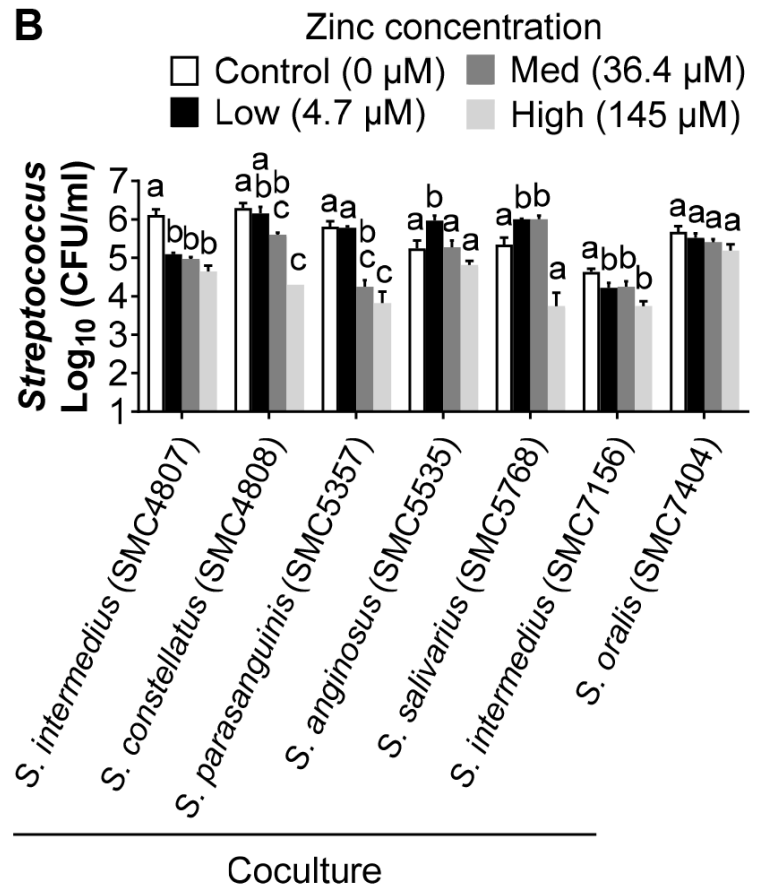

Source: https://www.biorxiv.org/content/biorxiv/early/2019/10/01/789099.full.pdf
